# Supplementary material for: miR-182 integrates apoptosis, growth, and differentiation programs in glioblastoma
Source: PubMed Central journal article supplement — Genes Dev. 2015 Apr 1;29(7):732–45. doi: 10.1101/gad.257394.114 (PMC4387715; doi:10.1101/gad.257394.114), 2015-04-01
Supplement: supp_gad.257394.114_SuppFiguresS1-S11.pdf [file supp_gad.257394.114_SuppFiguresS1-S11.pdf]

A

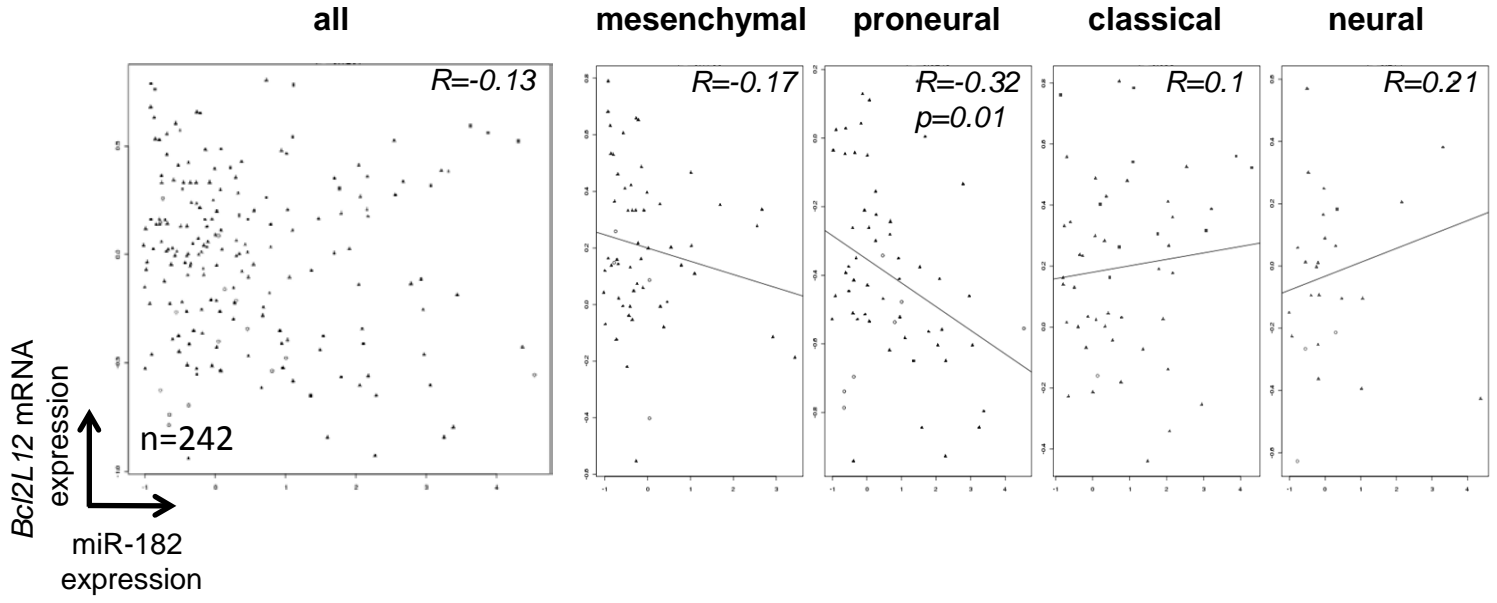

B

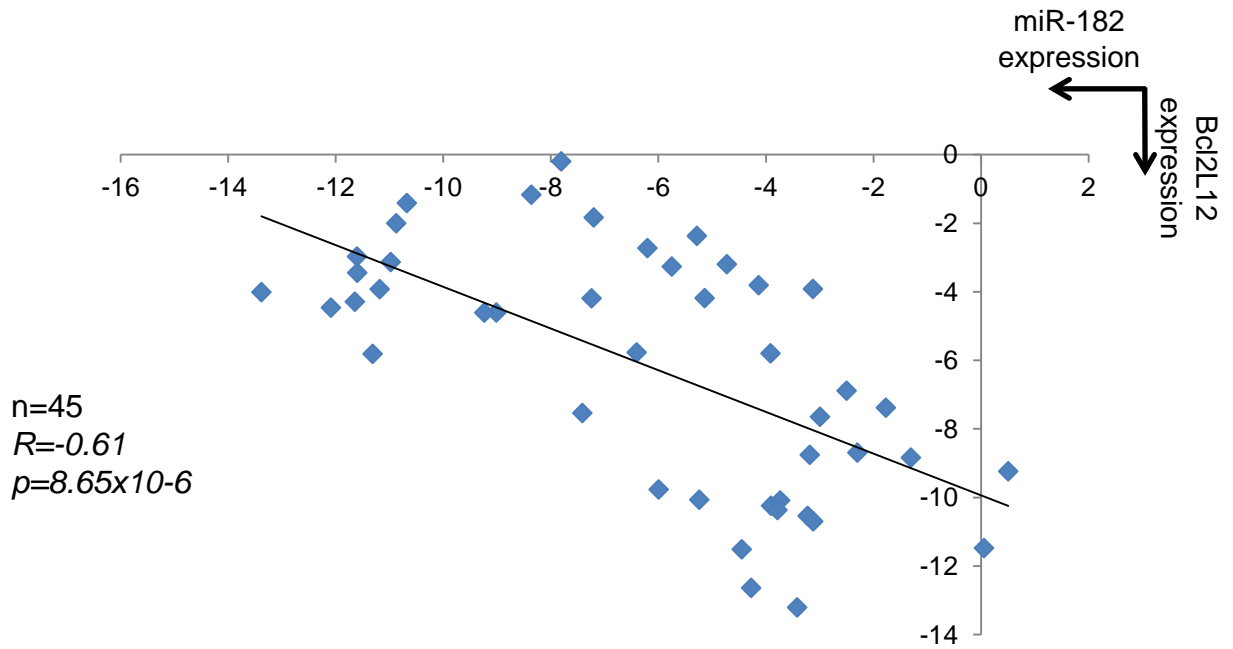

A

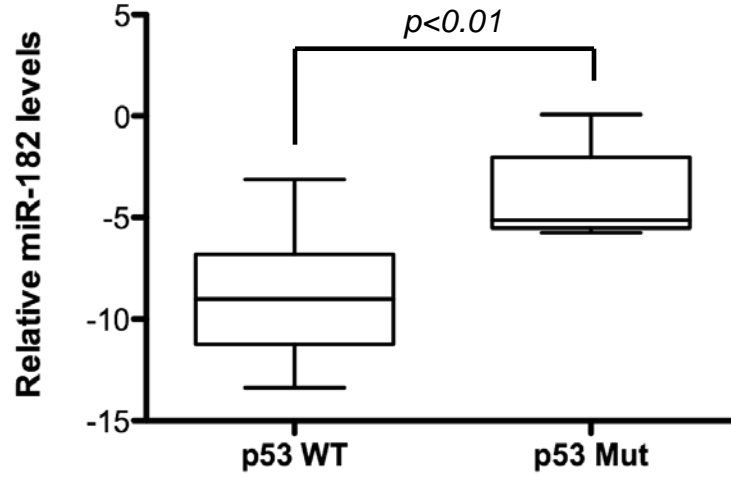

B

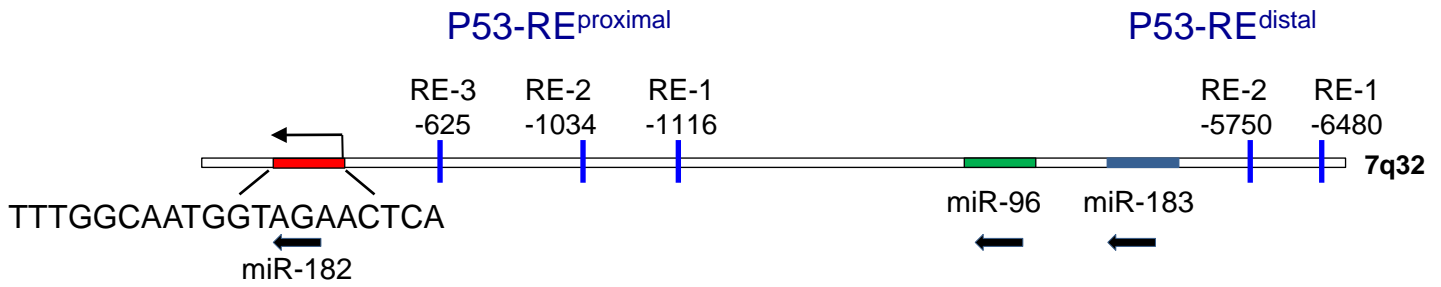

C

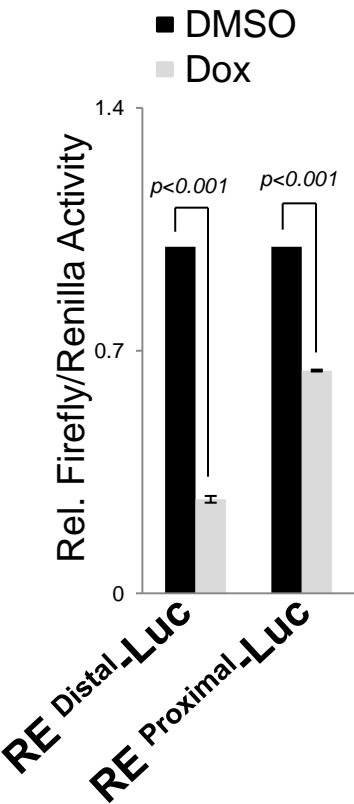

D

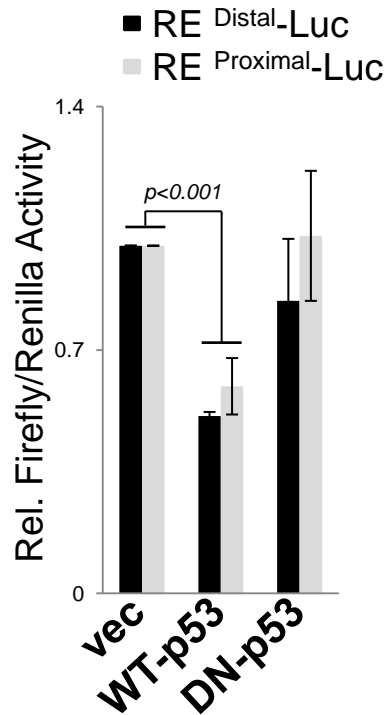

E

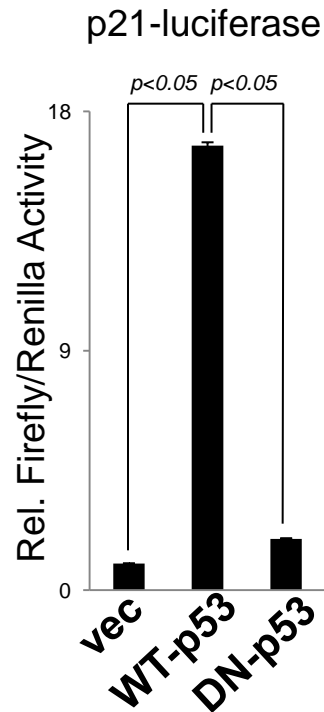

F

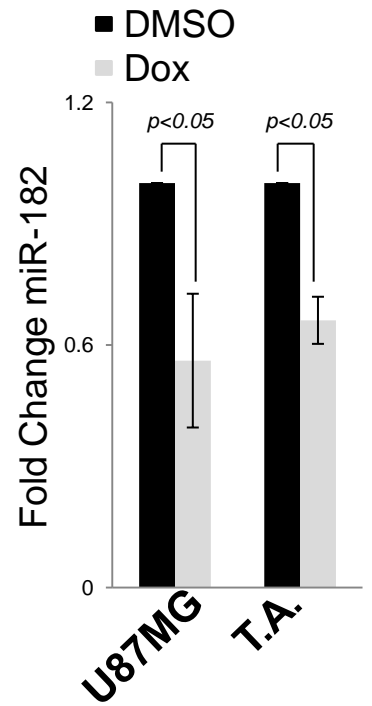

## GIC-20

A

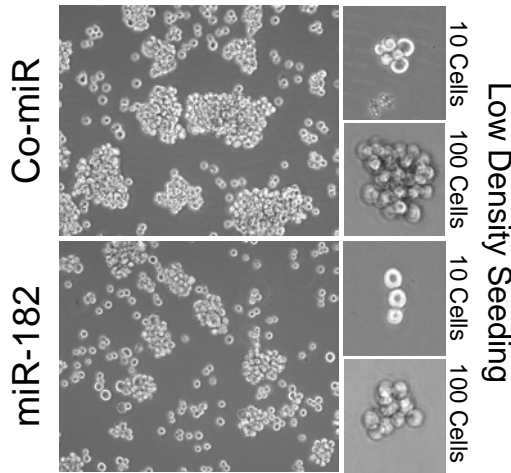

B

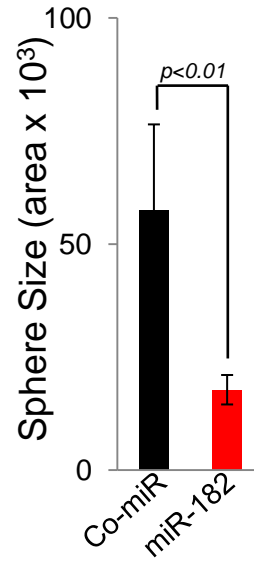

C

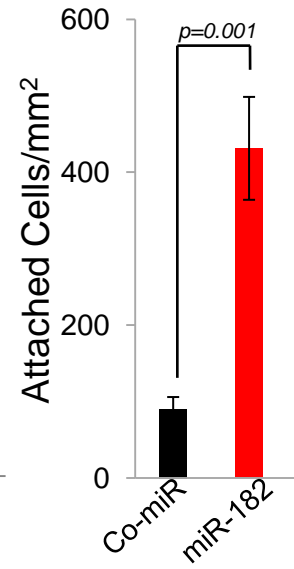

D

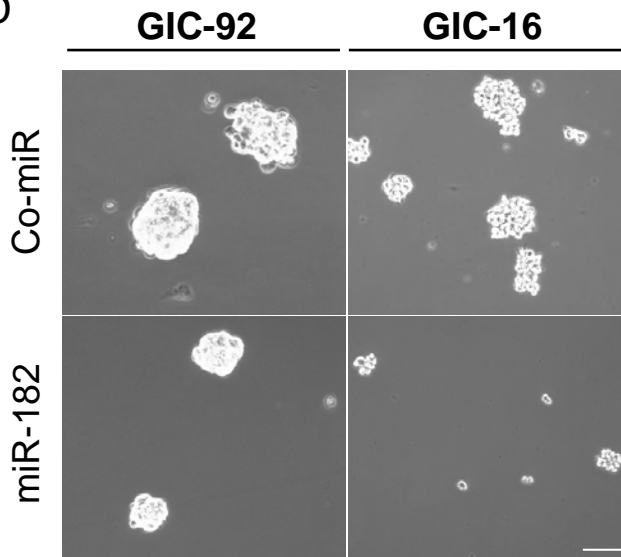

E

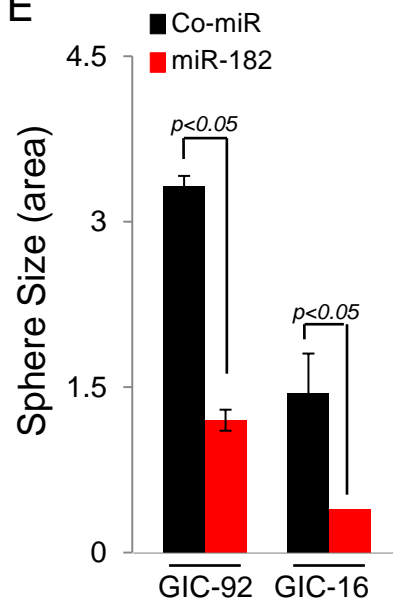

A

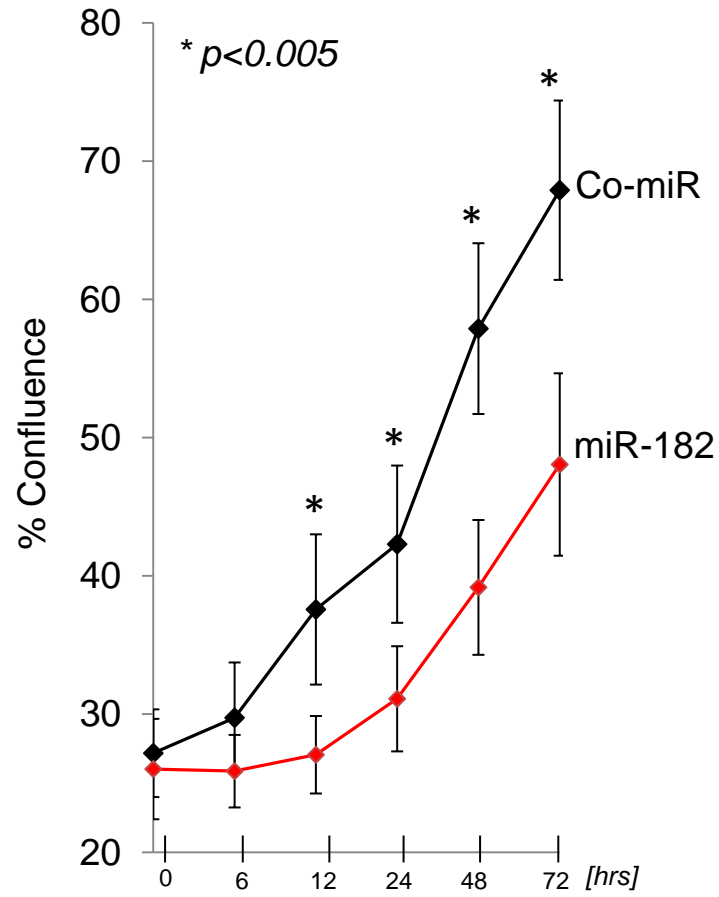

B

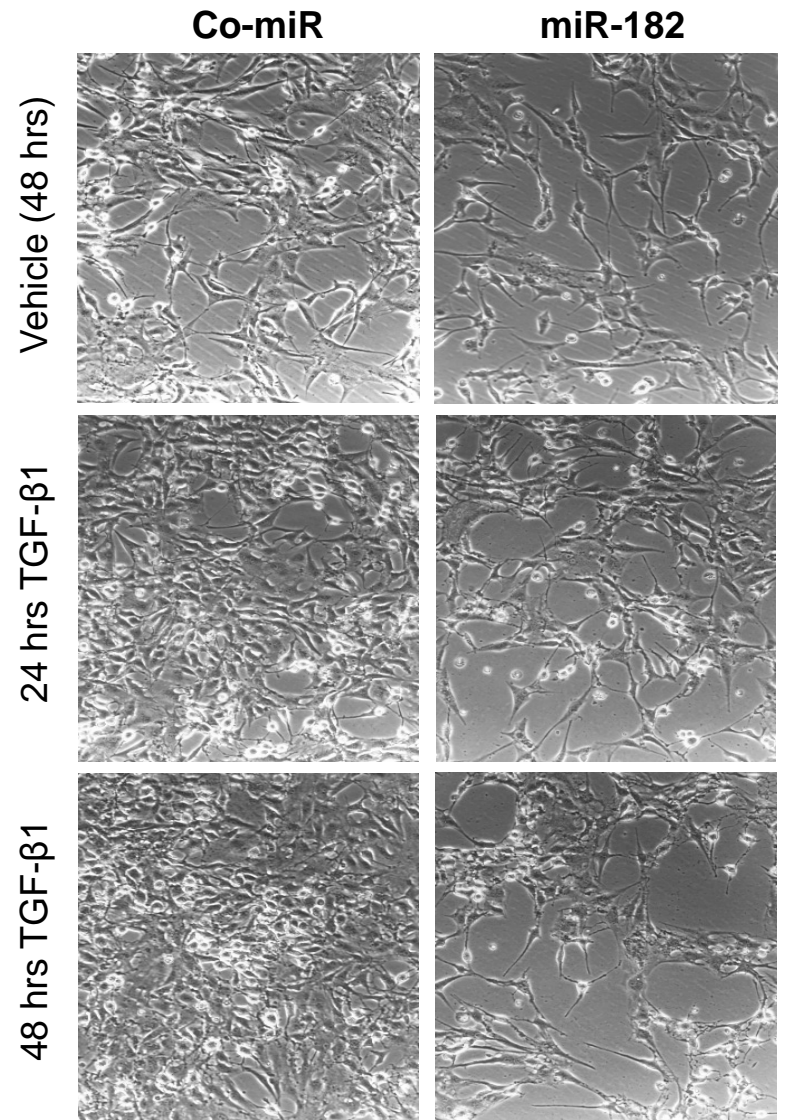

C

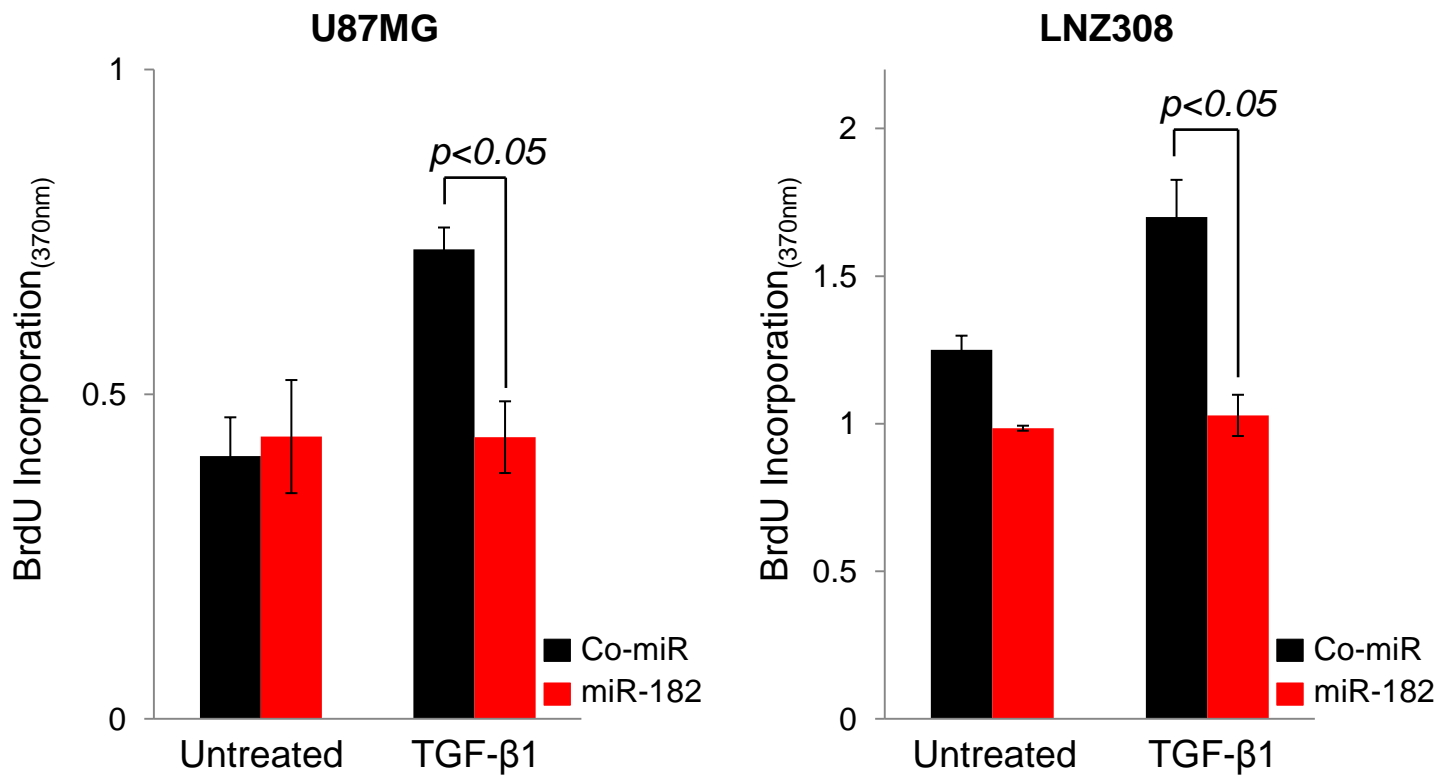

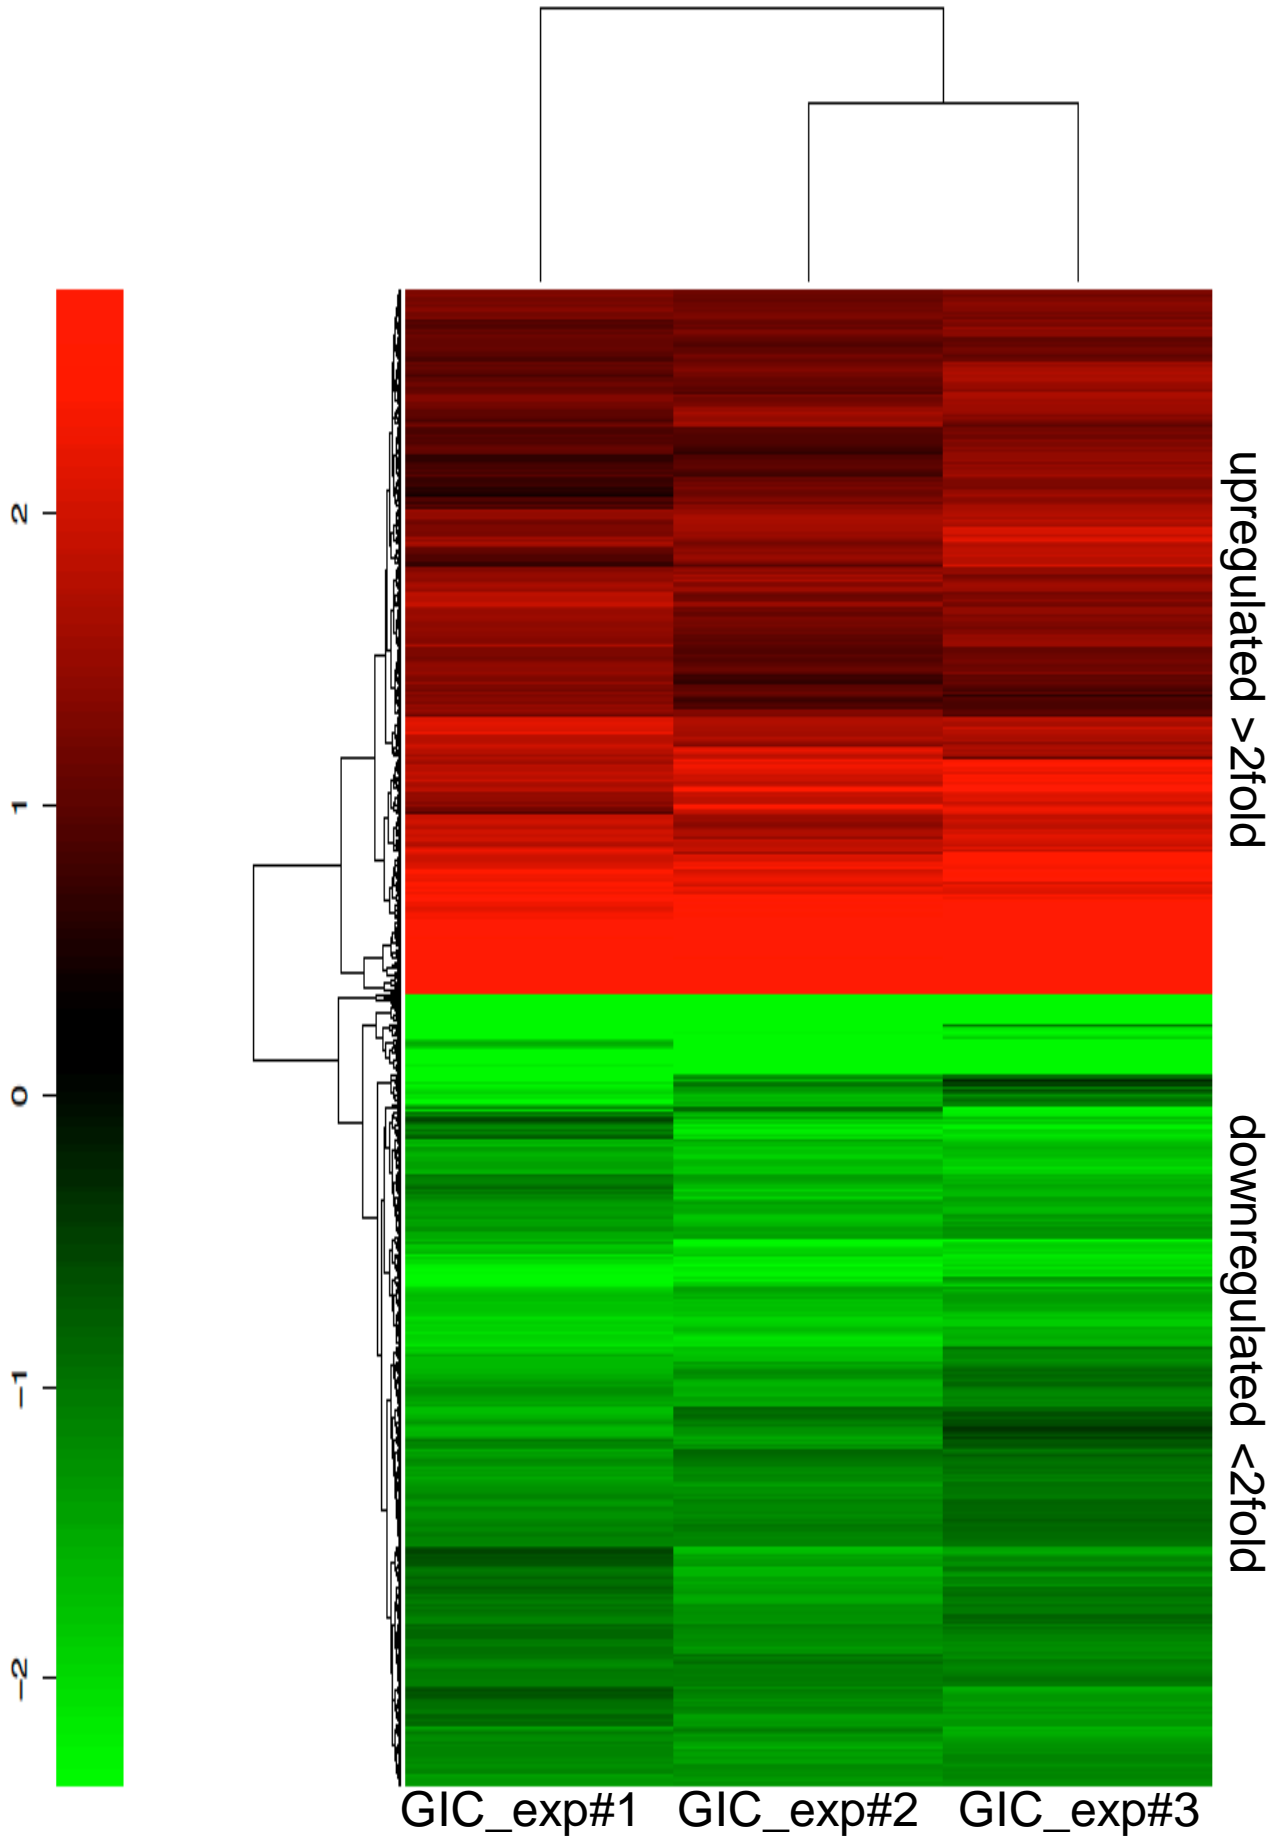

A

All 182-Target Genes

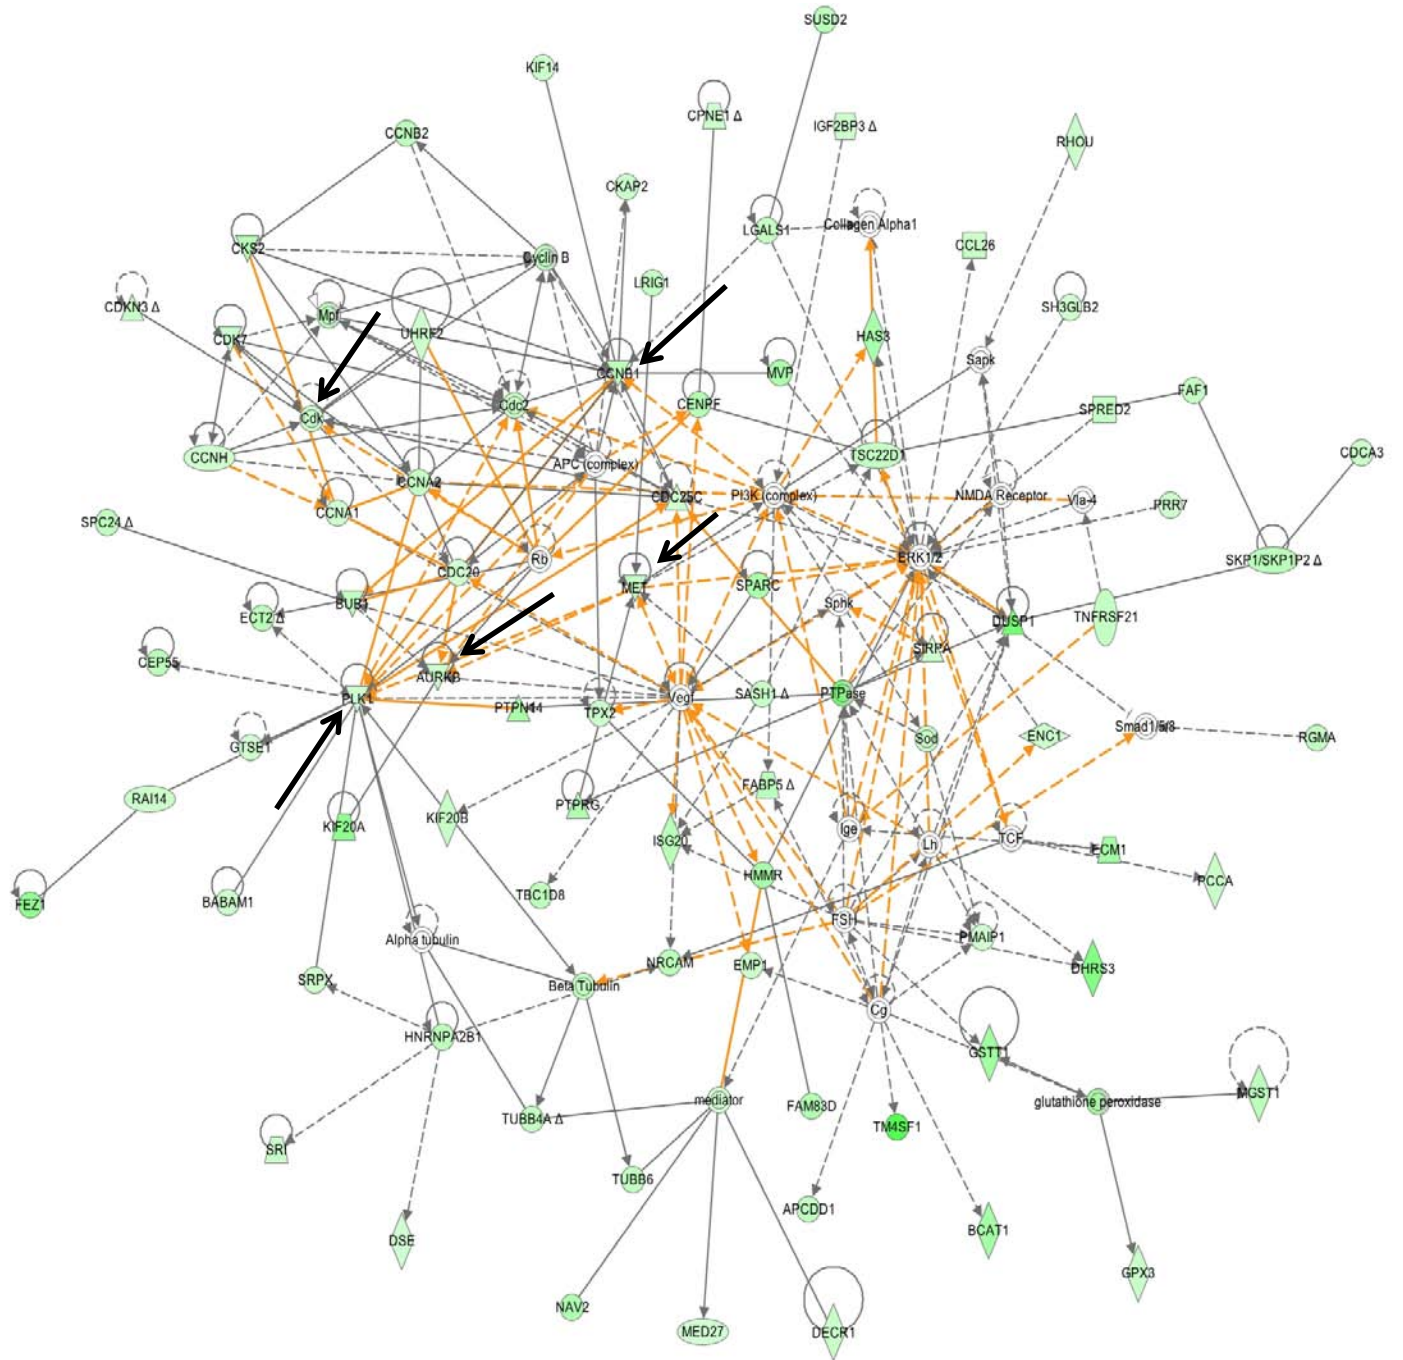

B

## Direct 182-Target Genes

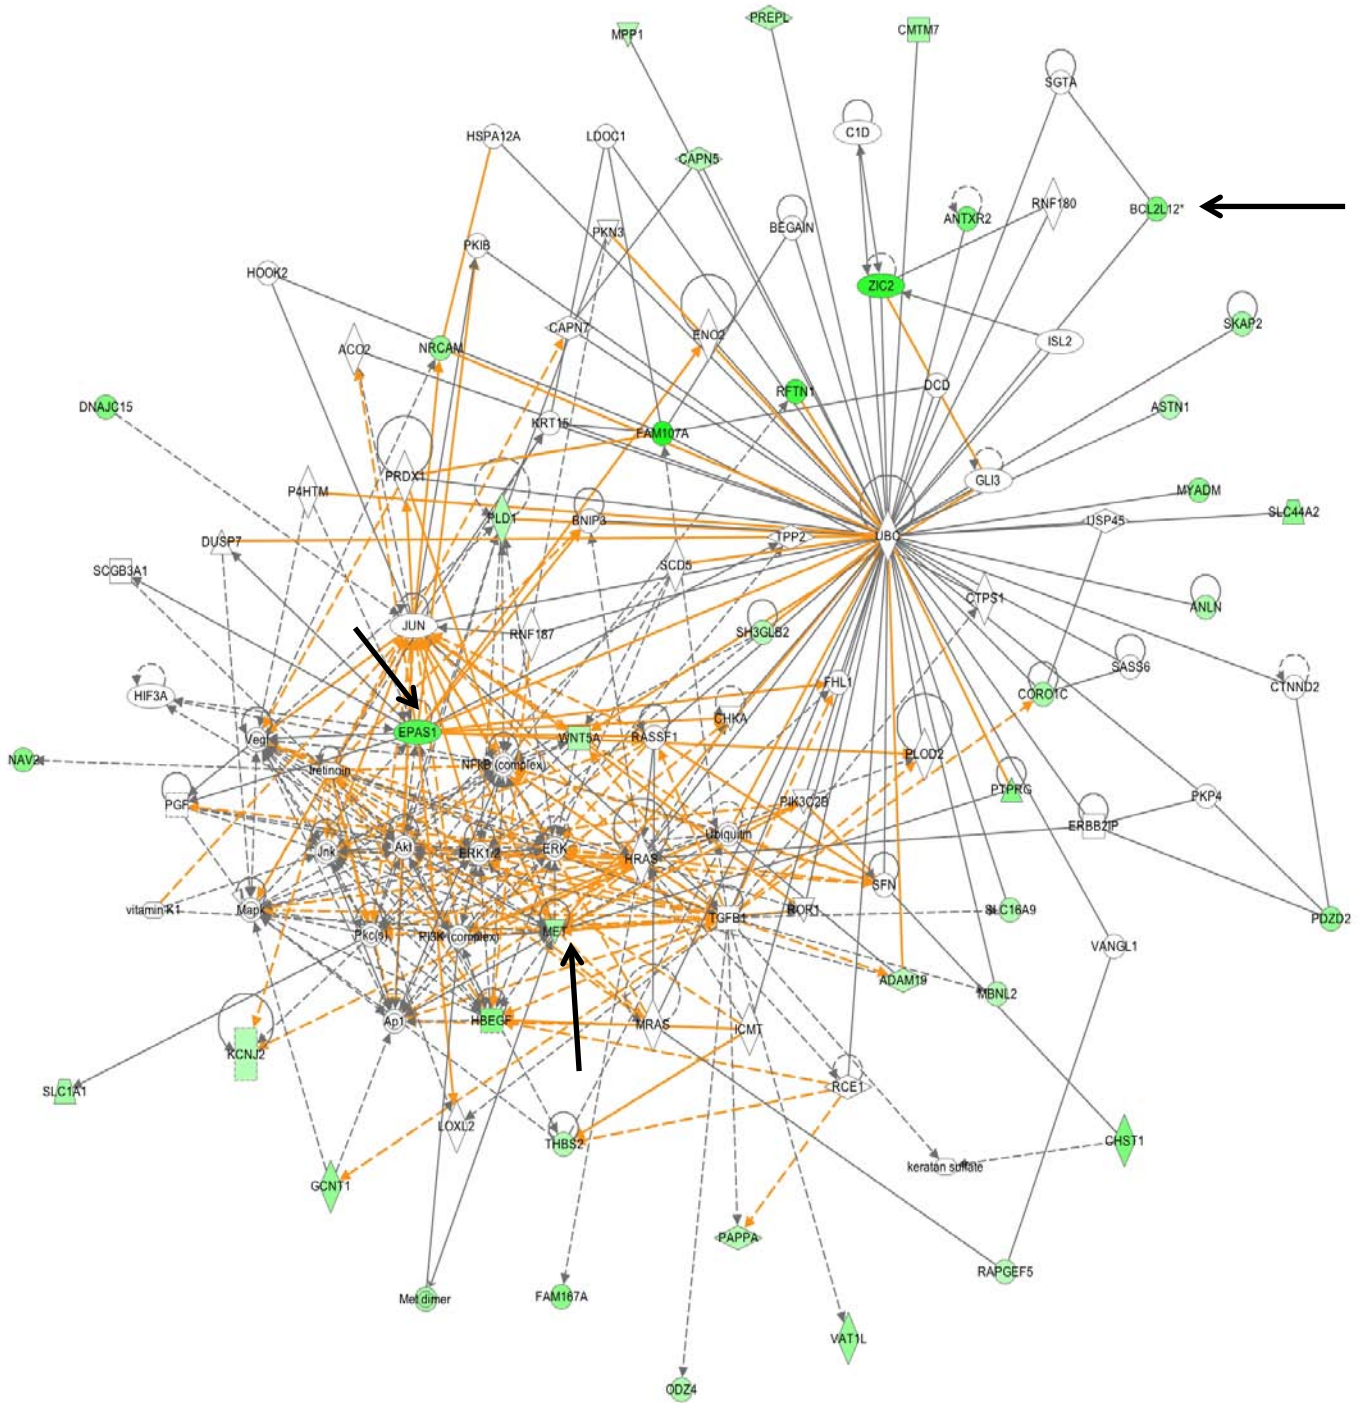

C

| Upstream Regulator             | Molecule Type           | Predicted Activation State | Activation z-score | p-value of overlap |
|--------------------------------|-------------------------|----------------------------|--------------------|--------------------|
| 1. CDKN1A                      | kinase                  | Activated                  | 2.127              | 1.91E-17           |
| 2. TP53                        | transcription regulator |                            | -0.448             | 2.93E-15           |
| 3. ERBB2                       | kinase                  | Inhibited                  | -3.196             | 9.08E-13           |
| 4. <b>TGFB1</b>                | <b>growth factor</b>    | <b>Inhibited</b>           | <b>-4.628</b>      | <b>2.45E-12</b>    |
| 5. HGF                         | growth factor           | Inhibited                  | -4.786             | 3.05E-10           |
| All 182 Target Gene dataset    |                         |                            |                    |                    |
| 1. <b>TGFB1</b>                | <b>growth factor</b>    | <b>Inhibited</b>           | <b>-2.533</b>      | <b>0.0000274</b>   |
| Direct 182 Target Gene dataset |                         |                            |                    |                    |

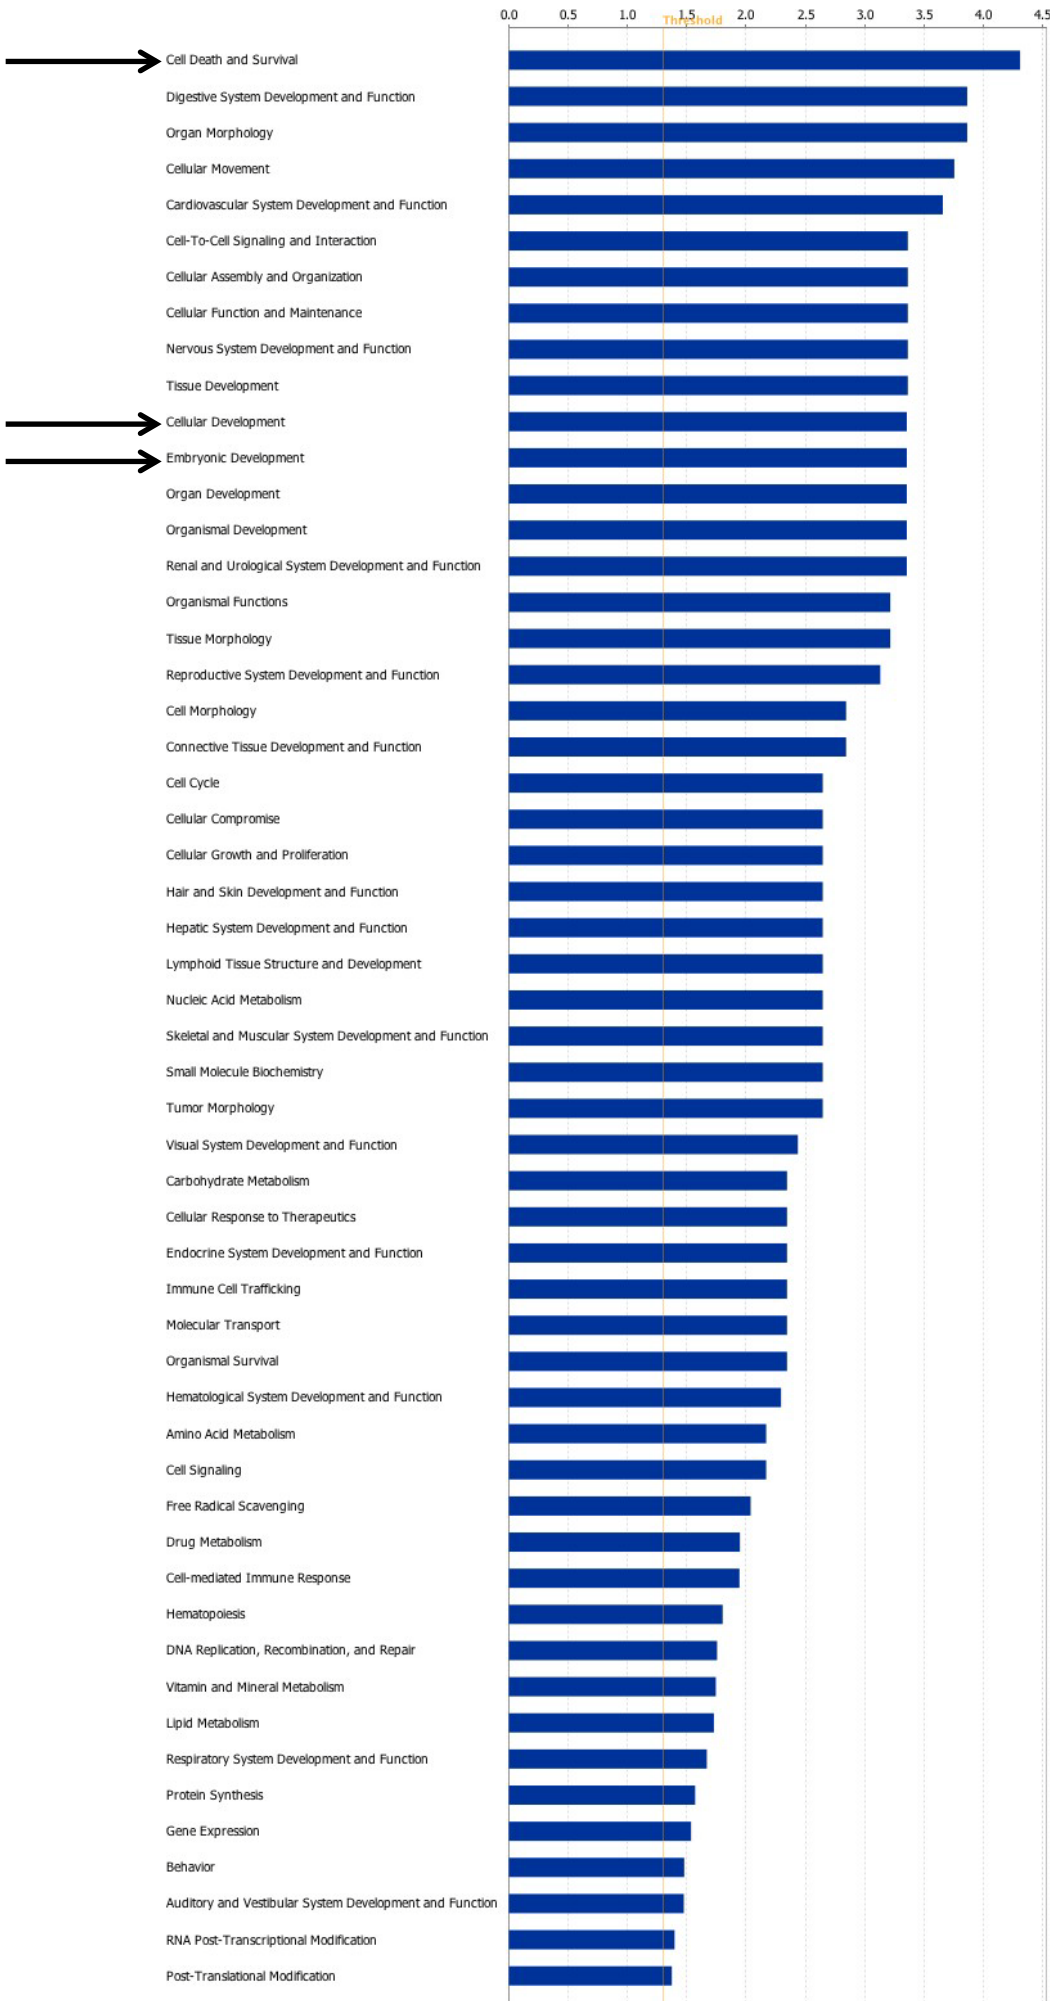



A

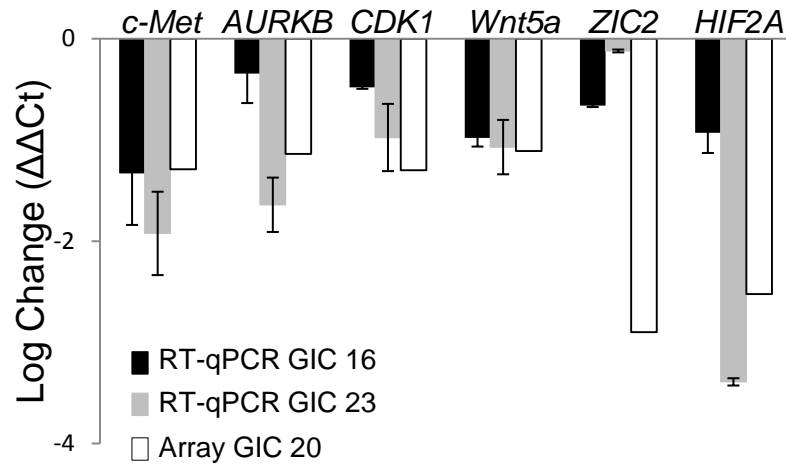

B

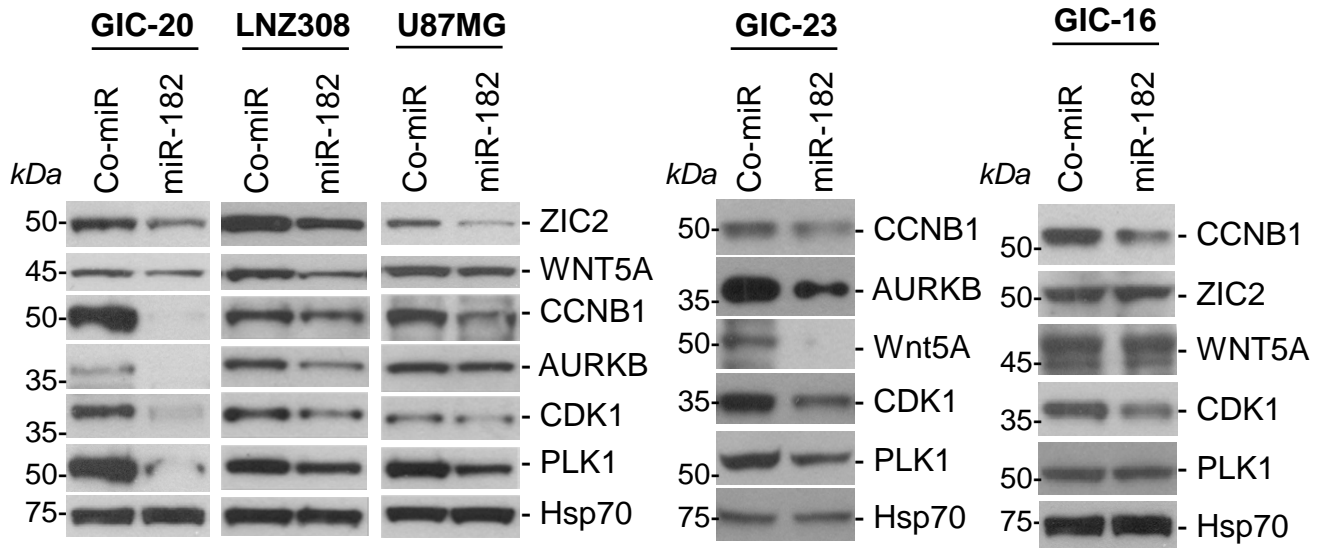

A

## HIF2A 3'-UTR ( 2043 bp)

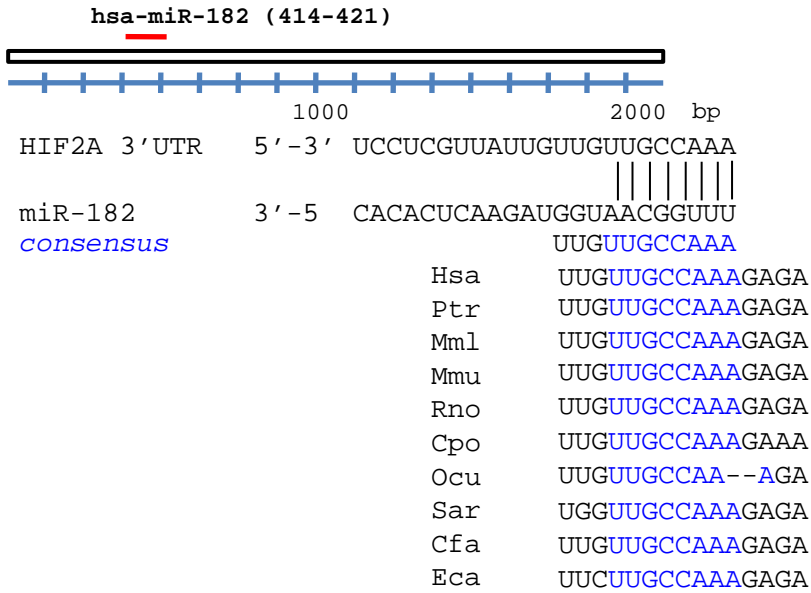

## Conserved

| microRNA    | HIF2A 3'UTR position | Seed Match | Context + score |
|-------------|----------------------|------------|-----------------|
| hsa-miR-182 | 414-421              | 8mer       | -0.24           |

## Poorly Conserved

| microRNA    | HIF2A 3'UTR position | Seed Match | Context + score |
|-------------|----------------------|------------|-----------------|
| hsa-miR-182 | 1653-1660            | 8mer       | -0.32           |

B

## c-Met 3'-UTR (2262 bp)

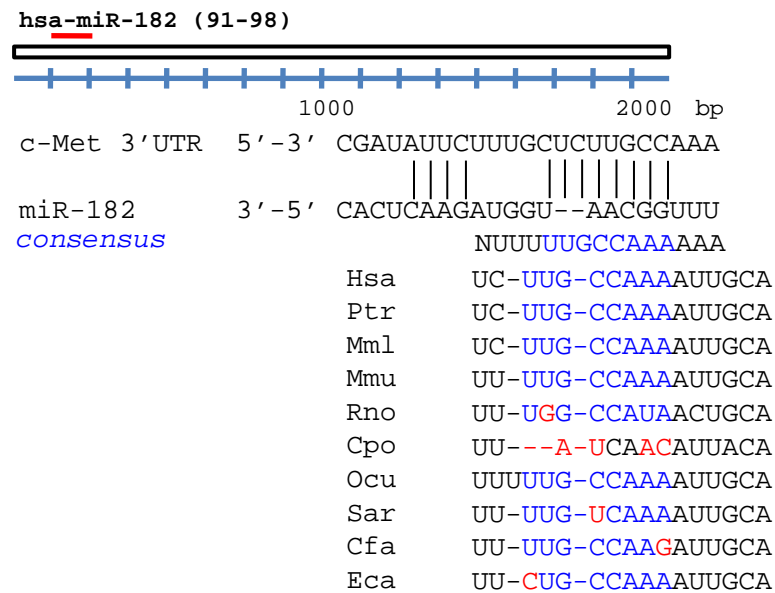

## Conserved

| microRNA    | c-Met 3'UTR position | Seed Match | Context + score |
|-------------|----------------------|------------|-----------------|
| hsa-miR-182 | 91-98                | 8mer       | -0.35           |

## Poorly Conserved

| microRNA    | c-Met 3'UTR position | Seed Match | Context + score |
|-------------|----------------------|------------|-----------------|
| hsa-miR-182 | 698-704              | 7mer-m8    | -0.02           |
| hsa-miR-182 | 1655-1661            | 7mer-m8    | -0.11           |

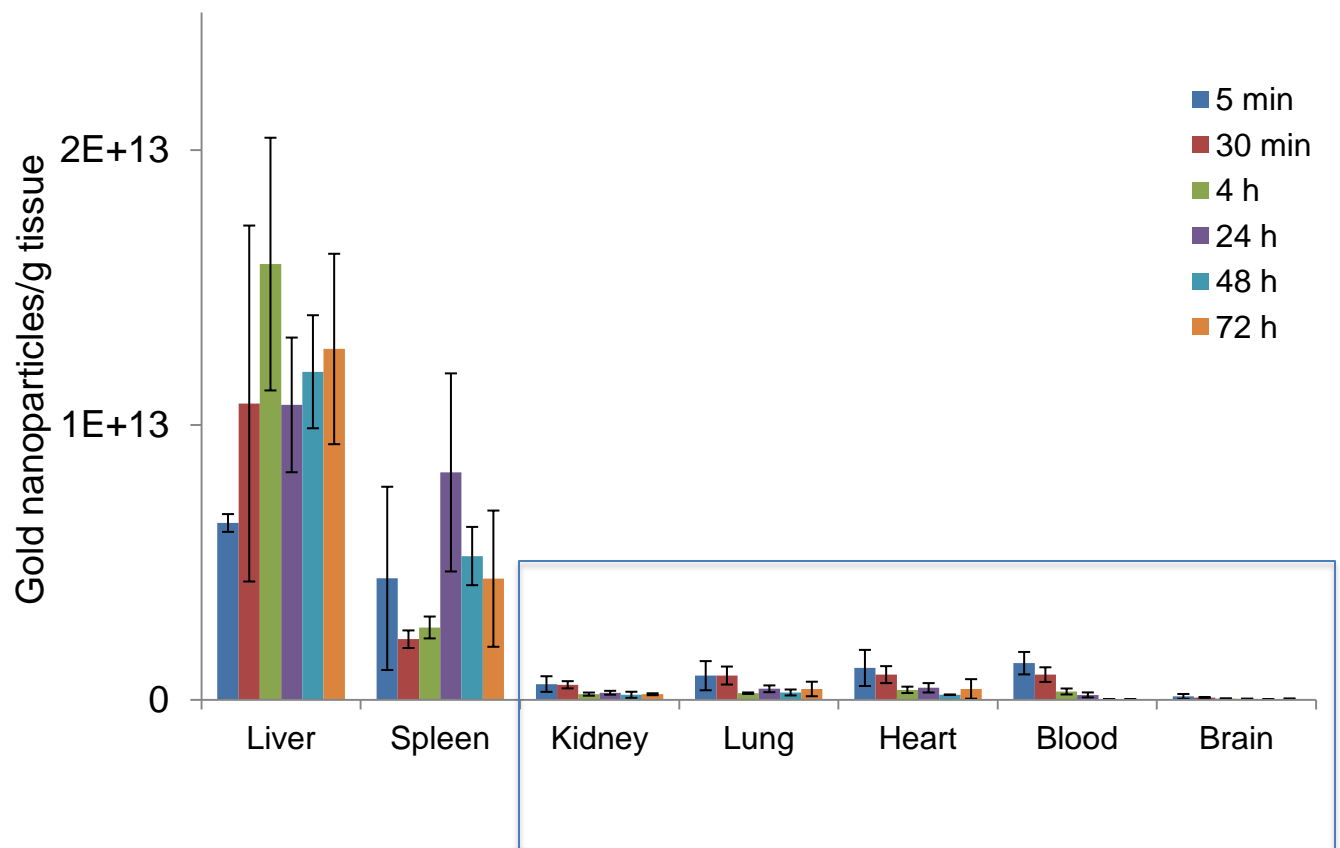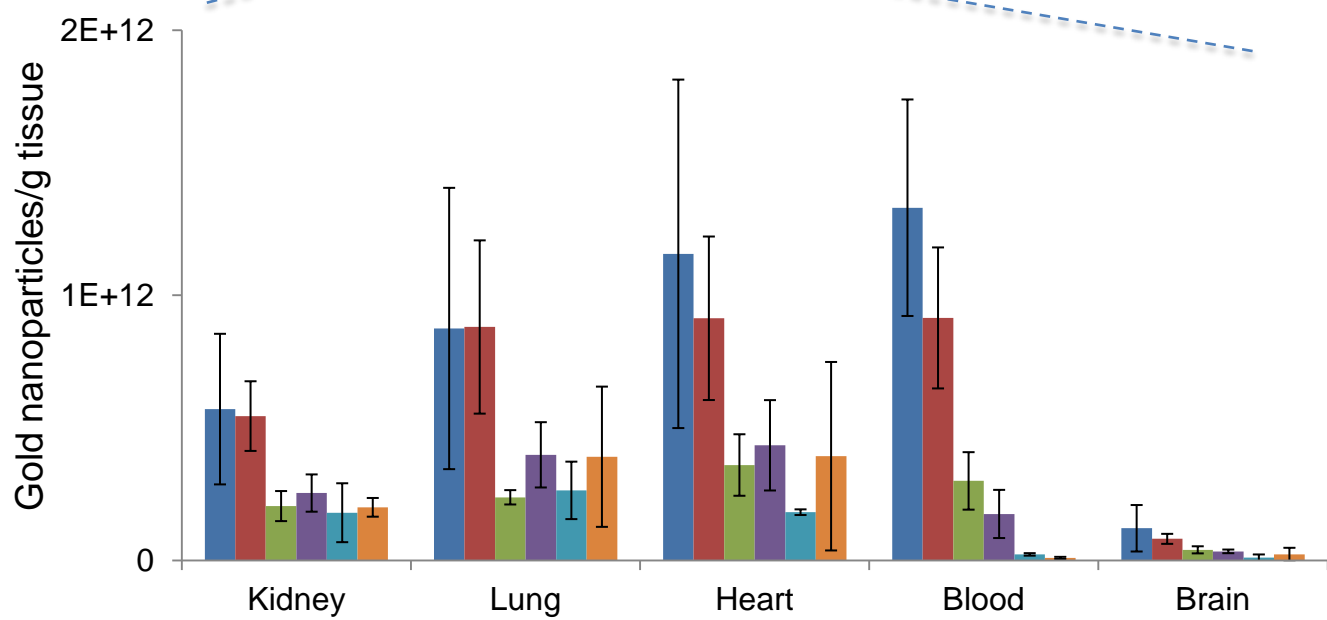

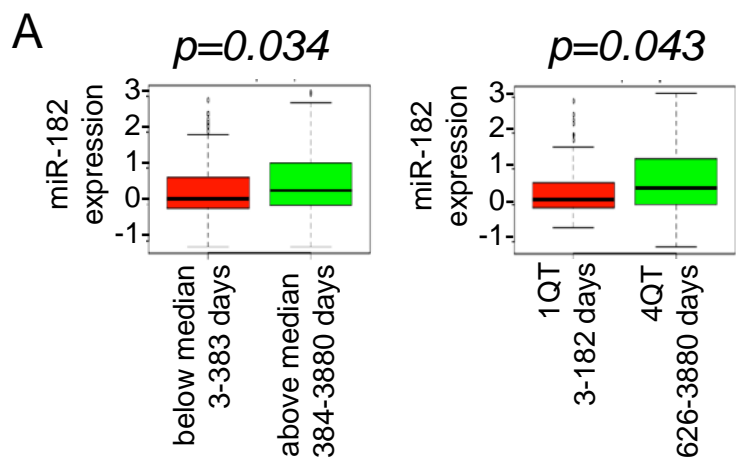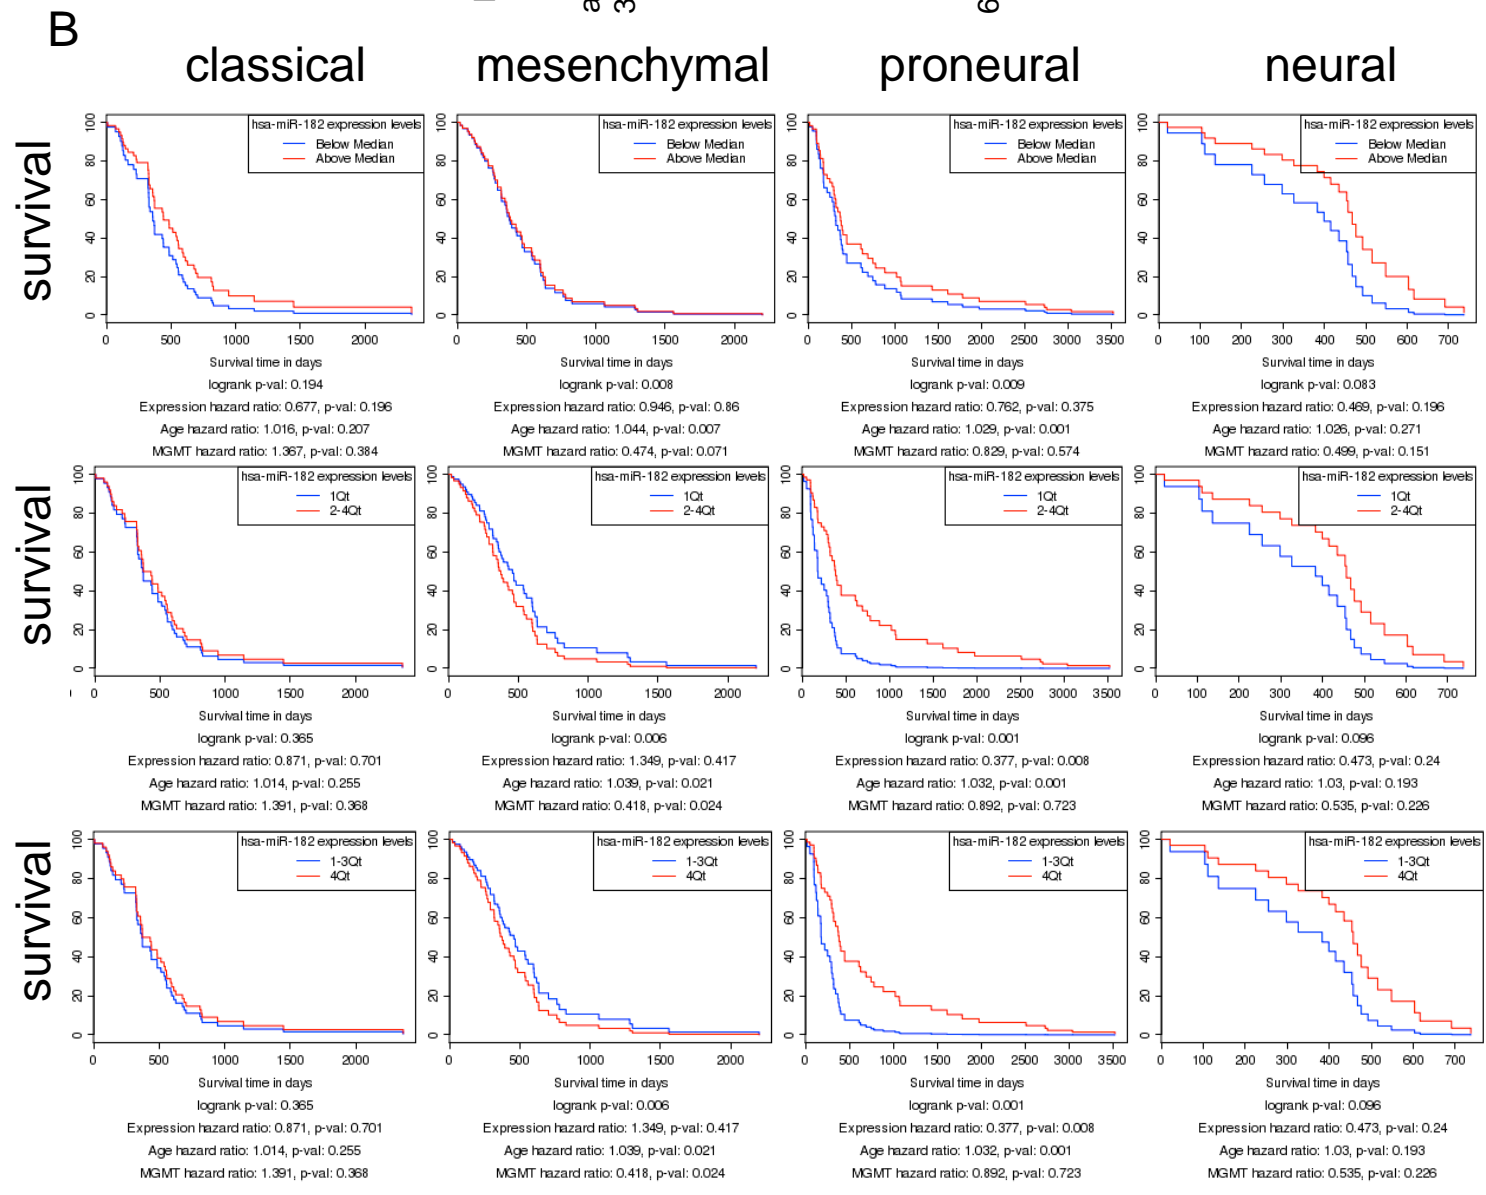

Cox proportional hazard analysis  
with age and MGMT status as co-variants
