# Supplementary material for: miR-182 integrates apoptosis, growth, and differentiation programs in glioblastoma
Source: PubMed Central journal article supplement — Genes Dev. 2015 Apr 1;29(7):732–45. doi: 10.1101/gad.257394.114 (PMC4387715; doi:10.1101/gad.257394.114), 2015-04-01
Supplement: supp_gad.257394.114_SuppText_Tables.pdf [file supp_gad.257394.114_SuppText_Tables.pdf]

## **SUPPLEMENTARY MATERIALS**

### **EXPERIMENTAL PROCEDURES**

#### **Transfection of miR-182, miR-182 inhibitor, and siRNAs**

Subconfluent glioma cells were transfected using Lipofectamine 2000 (Invitrogen, Carlsbad, CA) with 15 nM of synthetic premature human miR-182 (Ambion, Carlsbad, CA), or a human miR-control (Co-miR). The culture media were changed to fresh DMEM containing 10% FBS 24 hrs post-transfection. The effects on the target genes were tested 48 hrs post transfection. The same protocol was followed for the transfection of 50-100 nM anti-miR-182 (Ambion, Carlsbad, CA) or anti-Co-miR. Glioma cell lines were transfected with pools of siRNAs against Bcl2L12 (Dharmacon, Pittsburgh, PA), c-Met (Dharmacon, Pittsburgh, PA) and HIF2A (Dharmacon, Pittsburgh, PA) using Lipofectamine 2000. The effects on target gene levels were tested 48 hrs post transfection.

#### **Quantitative Real-time PCR**

Total RNA was isolated from glioma cells and patient derived GICs using the miRVana RNA extraction kit (Ambion, Carlsbad, CA). Complementary DNA was synthesized from 500 ng of total RNA using Superscript III reverse transcriptase (Invitrogen, Carlsbad, CA) and oligo d(T) primers (Promega, Fitchburg, WI). Quantitative PCR was carried out with SYBR Green (ABI, Foster City, CA), or TaqMan Universal PCR Master Mix (ABI, Foster City, CA) on the Applied Biosystems 7500 cycler. The following Taqman probes were used: 18s (4333760), ZIC2 (Hs00600845), c-Met (Hs01565584), CDK1 (Hs00938777), CCNB1 (Hs00259126), WNT5A (Hs00998537), AURKB1 (Hs00945858), EPAS1 (Hs01026149\_m1), CD44 (Hs01075861\_m1), NANOG (Hs04260366\_g1), PROM1 (Hs01009250\_m1), POU5F1 (Hs04260367\_gH), SOX2

(Hs01053049\_s1), hsa-miR-182 (002334) and Z30 (001092). Specific primer sequences were used for Bcl2L12 (CCATCGACAGAGAAGGAAGC and GCTACAGAACAGCTCCACCA) and TATA-binding protein (TBP) (GGCTGTTTAACTTCGCTTCC and CCTAGAGCATCTCCAGCACA). Results were analyzed using the DD<sub>Ct</sub> method (log<sub>2</sub> change) ( $\Delta\Delta C_t = \Delta C_{t_{treated}} - \Delta C_{t_{untreated}}$ ).

### **Western blotting**

Protein lysates were extracted from adherent glioma cells and GICs using RIPA buffer (Boston Bioproducts, Ashland, MA) containing protease and phosphatase inhibitors. 20 µg of proteins were separated using 4-12% gradient SDS-PAGE, transferred to Hybond PVDF membrane (GE Healthcare, Cleveland, OH), blocked with 5% milk and incubated overnight with the following antibodies: anti-Bcl2L12 (anti-L12-1 rabbit serum Ref 1:1000 dilution, (Stegh et al., 2007)), cleaved caspase-3 (Cell Signaling, Danvers, MA, 1:1000 dilution), cleaved caspase-7 (Cell Signaling, Danvers, MA, 1:1000 dilution), c-Met (Cell Signaling, Danvers, MA, 1:1000 dilution), WNT5A (Cell Signaling, Danvers, MA, 1:1000), CCNB1 (Cell Singaling, Danvers, MA, 1:1000 dilution), CDK1 (Cell Signaling, Danvers, MA, 1:1000 dilution), AURKB1 (Cell Singaling, Danvers, MA, 1:1000), HIF2A (Cell Signaling, Danvers, MA, 1:1000 dilution), pAKT (Cell Signaling, Danvers, MA, 1:1000 dilution), AKT (Cell Signaling, Danvers, MA, 1:1000 dilution), CD44 (Cell Signaling, Danvers, MA, 1:2000 dilution), Nestin (Millipore, St. Charles, MO, 1:1000 dilution) and Hsp70 (BD Biosciences, San Jose, CA, 1:20000 dilution). After washing with 1xPBS+Tween (PBST), the membranes were incubated with a secondary goat anti-rabbit or goat anti-mouse antibody conjugated to horseradish-peroxidase (Santa Cruz, Dallas, TX, 1:2500 dilution) for 1 hr. The signal was detected using Enhanced Chemiluminescence kit (GE Healthcare, Cleveland, OH).

## Luciferase Assays

The 3'UTR of *Bcl2L12*, *c-Met* and *HIF2A* were cloned downstream of the Luciferase gene in a pGL3 vector (gift of Dr. R. Awatramani, Northwestern University). The full-length 3'UTR of *Bcl2L12* was cloned using XbaI (NEB, Ipswich, MA) restriction sites. Part of the 3'UTR of *c-Met* (position 1-239bp) containing the miR-182 target site (seed match position 91-98bp) and *HIF2A* (position 321-518bp) containing the miR-182 target site (seed match position 414-421bp) was cloned into pGL3 using XbaI restriction sites. The pGL3 Luciferase vector was transfected into 293T cells in combination with a Renilla reporter, and the synthetic premature miR-182 or Co-miR (200 nM). 24-48 hrs post transfection, cells were lysed using passive lysis buffer, and Firefly and Renilla luciferase activities were measured using the Dual-Luciferase Reporter Assay System (Promega, Madison, WI). For mutating the seed sequence in the *Bcl2L12* 3'UTR specific primers were utilized carrying the desired nucleotide alterations, 5'TTTCGGATAAATAAATTGTTTAAACTTTTCTTAT 3' and 5'AACAGGTAGGGCAAC CACCACCCACAGCCCTGAG 3'. The promoter area of miR-182 was cloned upstream of the Luciferase gene in a pGL3 vector using NheI and XhoI (NEB, Ipswich, MA) restriction sites.

## Cell Death Assays

Activity of caspase -3 and -7 was detected by a fluorometric assay using the Caspase-Family Fluorometric Substrate Set Plus Kit (Biovision, Miltipas, CA) according to manufacturer's instructions. Annexin V positivity was measured by flow cytometric analysis, using the Annexin V-Cy5 Apoptosis Detection Kit (Biovision, Miltipas, CA). Briefly, glioma cells were transfected with 15 nM of synthetic pre-mature miR-182 or Co-miR for 24 hrs. Media were replaced, and cells were treated with 0.2  $\mu$ M of staurosporine (Sigma, St. Louis, MI) for 24 hrs. Next, cells were collected and resuspended in 500  $\mu$ l of 1x Annexin V Binding Buffer. Annexin V-Cy5 was

added to the cells for 5 min. The cells were counterstained with DAPI and analyzed by flow cytometry (LSR Fortessa, 20,000 counts).

### **Microarray Profiling**

Patient-derived GICs were transduced with lentiviral particles containing either pLenti III-miR-182-GFP or pLenti III-Co-miR-GFP vector to stably overexpress hsa-miR-182. The overexpression of miR-182 was verified by RT-qPCR. Total RNA was extracted using the miRVana RNA extraction kit (Ambion, Carlsbad, CA). The quality of the RNA was evaluated by Bioanalyzer, and was further processed for whole genome profiling using the Illumina HumanHT-12 Beadchip expression technology (Illumina, San Diego, CA, USA). Cutoff conditions for significant gene changes were  $p < 0.05$  and Fold Change  $> 2$ .

### **Proliferation assay**

Subconfluent LNZ308 were transfected with synthetic miR-182/Co-miR (15 nM), anti-miR-182/anti-Co-miR (50 nM), or scramble/c-Met-targeting siRNAs (50 nM), alone and in combination with anti-miR-182 (100 nM). The next day, cells were trypsinized and plated in 96 wells ( $7 \times 10^3$  cells per well). Cells were synchronized for 6-8 hrs in DMEM, and subsequently treated with TGF- $\beta$ 1 (10 ng/ml) (Gibco, New York, NY) for 48 hrs. The effects on cellular proliferation were measured by the Cell Proliferation ELISA, BrdU colorimetric assay (Roche, Indianapolis, IN), following manufacturer's instructions. Briefly, cells were labeled with BrdU for 4 hrs, fixed and incubated with an anti-BrdU antibody conjugated to peroxidase. After addition of substrate, the absorbance was measured at 370 nm.

### **Cell growth Assay**

Subconfluent LNZ308 cells were transfected with miR-182/Co-miR (15 nM) for 24 hrs. The next day, cells were trypsinized and plated in 96 wells ( $7 \times 10^3$  cells per well). Cells were synchronized for 6-8 hrs in DMEM, and subsequently treated with 10% FBS. The cells were placed in an IncuCyte ZOOM (Essen BioScience), where images were taken every 3 hrs. The effects on cell growth are presented as percent confluence.

### **Oligonucleotide synthesis**

RNA oligonucleotides were synthesized with TOM-RNA reagents (Glen Research) on a MerMade 6 (Bioautomation, for small scale studies), or an ÄKTA Oligopilot (GE Healthcare, for large scale studies) according to manufacturer-recommended cleavage and deprotection protocols. Oligonucleotides were purified by reverse-phase high performance liquid chromatography (RP-HPLC) on a Varian Microsorb 300-10 C<sub>18</sub> column with 0.05 M triethylammonium acetate (TEAA) at pH 7 with 1%/min gradient of 100% CH<sub>3</sub>CN, while monitoring the UV signal of the nucleic acids at 254 nm. The aqueous buffer was treated with 0.1% diethylpyrocarbonate (DEPC, Sigma) and autoclaved to inactivate RNase enzymes. After purification, the oligonucleotides were lyophilized and stored at -80°C until further use. Sequence information for the miR182 and nonsense duplexes are shown in Figure 3B. Note that the sense strands are terminated with a propylthiol to mediate attachment to AuNPs.

### **miRNA-Mimic Spherical Nucleic Acid Synthesis and Characterization**

Citrate stabilized gold nanoparticles (AuNPs,  $13 \pm 1$  nm) were prepared using the Frens method (1), treated with 0.1% DEPC, and autoclaved to inactivate RNases. RNA duplexes were hybridized and added to RNase-free AuNPs in a solution containing 150 mM NaCl and 0.2% Tween-20 (2 nmol duplex per mL AuNP), where they could chemisorb via a thiol-gold bond. To prevent duplex dehybridization, the NaCl concentration was slowly increased to 350 mM over

12-24 h. RNA-coated AuNPs were then treated with 10  $\mu$ M mPEG-SH (5 kDa, Laysan Bio, Inc.) for 2-4 hrs, purified by transflow filtration (50 kDa mPES filters, Spectrum Laboratories, Inc.), and suspended in sterile, RNase-free phosphate-buffered saline (PBS) to the desired concentration for the intended application. To generate fluorescent SNAs, Cy5.5 phosphoramidite (Glen Research) was manually coupled to the 5' end of the sense strands prior to duplex hybridization, or alternatively, Cy5.5-NHS (GE Healthcare) was attached via a 5 kDa SH-PEG-NH<sub>2</sub> (Laysan Bio., Inc.) backfill.

Dynamic light scattering, zeta potential measurements, and an OliGreen assay were performed to confirm and quantify the presence of miRNA on AuNPs. In the OliGreen assay, 5 nM SNAs diluted in 8M urea were heated to 45°C for 20 min to dehybridize the antisense strands from the sense strands, which remain on the AuNP. The sense-loaded AuNPs were pelleted by centrifugation (30 min, 21000 x g), and the supernatant containing the antisense strands was collected and incubated with components of the Quant-iT OliGreen Assay (Invitrogen™) for 5 min. Standards of known antisense RNA concentration were also incubated with OliGreen reagents to create a standard curve, and fluorescence was measured using a BioTek® Synergy Multiplate reader with excitation/emission at 485 nm/520 nm. These analyses revealed that both the miR182-mimic and nonsense SNAs contain ~30 antisense strands per AuNP (for complete characterization see Figure 5C).

### **Pharmacokinetic Analysis**

Female CD1 mice (n=3 per time point) were intravenously injected with 182-SNAs at a dose of 200  $\mu$ g RNA/kg of body weight. Blood was collected prior to administration as well as at 5, 30 min and 4, 24, 48 and 72 hrs after 182-SNA administration. In addition, liver, spleen, kidney, lung, heart and brain were collected at the same time points. Gold content was analyzed by ICP-

MS. A two-compartment model using non-linear regression analysis was followed to calculate the pharmacokinetic parameters. According to this model, particle transportation between central and peripheral compartments follows first-order kinetics and particle elimination from central compartment follows again first-order kinetics and by using the equation  $SNA = Ae^{-\alpha t} + Be^{-\beta t}$ , where SNA is the particle concentration in the blood, A and B are hybrid coefficients and  $\alpha$  and  $\beta$  are rate constants for the distribution and elimination process, respectively and t is the time.

### ***In vitro* evaluation of miR-182-based SNAs.**

To assess the uptake of SNAs *in vitro*, Cy5.5-SNAs were added to subconfluent U87MG cells or GICs in the absence of FBS, supplement and growth factors for 24 hrs at a concentration of 1 nM. The cells were then counterstained with Hoechst dye (Molecular probes, Eugene, OR) for 30 min to visualize the nuclei. To measure the effect of scavenger receptor inhibition on SNA uptake, cells were pre-treated with PolyI (250  $\mu$ g/mL) for 24 hrs pre SNA administration. Cy5.5-SNAs (1 nM) were then added for 24 hrs, and cellular uptake was measured by confocal fluorescence microscopy. To assess the functionality of SNAs *in vitro*, 182-SNAs or Co-SNAs (5-15 nM) were added to sub-confluent U87MG cells for 48h, and the effects on Bcl2L12 and c-Met protein levels were evaluated by Western blotting. Glioma cells were treated with 182-SNAs or Co-SNAs for 48 hrs, and cultured in the presence of STS for the indicated periods of time. The effects on cleaved caspase -3 and -7 were determined by Western blotting. Furthermore, U87MG and LN2308 cells were treated with 182-SNAs or Co-SNAs, and their proliferative response to 10% FBS and TGF- $\beta$ 1 (10ng/ml) was determined by BrdU colorimetric assay (Roche, Indianapolis, IN).

### ***In vivo* evaluation of SNA in a GBM xenograft model**

All animals used were under an approved protocol of the Institutional Animal Care and Use Committee of Northwestern University. For intracranial cell inoculation, U87MG cells or GICs were suspended in Hank's Balanced Salt Solution at a concentration of  $1 \times 10^5$  and  $5 \times 10^5$  per 5  $\mu$ l respectively. Anesthetized female CB17 SCID mice (6-8 weeks) (Taconic Farms) were placed in a stereotaxic frame, and the surgical area was cleaned with Betadine<sup>®</sup>. An incision was made, and a 0.7 mm Burr hole was created in the skull with a microsurgical drill, 2 mm lateral right of the sagittal suture and 0.5 mm posterior of bregma. Glioma cells were administered through a Hamilton syringe, which was inserted 3.5 mm into the brain. Cells were injected over a period of 5 min. To assess therapeutic efficacy, 500 nM 182- or Co- SNAs were administered via the tail vein at a volume that allowed for 1.4 mg/kg (RNA/mouse weight) per injection, with injections performed every other day. The mice received 7 injections, for a total 182- or Co-SNA dose of 10 mg/kg. To assess the effects of SNA treatment on tumor growth, mice were imaged before the initiation of the systemic SNA delivery and on a weekly basis by IVIS analysis.

### **Evaluation of miRNA-Mimic SNA Delivery to Intracranial Glioma**

U87MG tumors ( $1 \times 10^5$  cells in 5  $\mu$ L medium) were grown in the right cerebrum of CB17 SCID mice for 13 days, during which the mice were fed a reduced alfalfa diet to lower background tissue fluorescence. Control animals received a sham surgery in which medium (without cells) was injected. Isoflurane-anesthetized mice were imaged with a Caliper Life Sciences IVIS Spectrum using 675 nm/720 nm excitation/emission filters to establish baseline autofluorescence, and then received 100  $\mu$ l Cy5.5-SNAs (450 nM) or saline via tail vein injection. Mice were imaged at 1, 2, and 22 hrs post-injection, and then the brains were excised for *ex vivo* imaging to determine the extent of SNA dissemination throughout intracranial tumors following systemic delivery.



## **Toxicology Studies**

Sprague-Dawley adult rats (n=3) were intravenously treated with PBS or 182-SNAs as a single dose on day 1 (10mg/kg; RNA/body weight). Animals were under observation on a daily basis one day before the treatment and daily afterwards. Body weights were recorded on day 1 and day 14. On day 1 and 14 blood samples were collected and the animals were sacrificed. Major organs were weighed and processed for immunohistochemical analysis. Blood samples were sent to Charles River Laboratories for further analysis (blood chemistry and CBC).

## **Inductively coupled plasma mass spectrometry (ICP-MS)**

U87MG, GIC-20, -23 and -387 tumor tissue was dried in a 50 °C oven overnight, weighted, and digested with 1 mL concentrated HCL: HNO<sub>3</sub> (3:1) at room temperature overnight. After adding 5 µL of 1 ppm indium (internal standard) and 5 mL of matrix solution (2% HCl and 2% HNO<sub>3</sub>), the Au-197 content of the resultant solution was measured by an iCAP™ Q ICP-MS (ThermoFisher) after subtracting the background gold content of untreated cells. Reported values represent ± SD from the average of three or more independent experiments.

## **Immunohistochemistry and Silver Staining**

U87MG and GIC-20 tumors were grown intracranially, followed by systemic delivery of 100 µl of 500 nM SNAs. After 24 hrs, the brains were excised, fixed in 10% formalin, paraffin-embedded, and sectioned. Silver staining was carried out to amplify the size of the SNAs via the deposition of silver on gold and allow their visualization by light microscopy. Briefly, tissue sections were deparaffinized in xylene (10 min) and hydrated through a series of ethanol (100%, 90%, 70%, 50%; 3 min each) and water (3 min x 3 rinses). Silver enhancement was then performed for 10 min using a commercial kit (Ted Pella, Inc). Samples were counterstained with

Mayer's Hematoxylin, mounted with Vectamount AQ aqueous mounting medium, coverslipped, and imaged. Adjacent tissue sections were treated in a similar way and stained for the endothelial marker CD31/PECAM1 (Santa Cruz, Dallas, TX, 1:1000 dilution). The sections were counterstained with Mayer's Hematoxylin and further imaged.

### **Mouse cytokine study**

Female CB17 SCID mouse (6-8 weeks) (Taconic Farm) received 7 injections of SNAs (total of ~10 mg/kg; RNA/body weight), and blood samples were collected on day 21. Serum was separated, and analyzed using Milliplex<sup>®</sup> MAP technology (Millipore, St. Charles, MO, USA), a bead-based suspension array, using fluorescent-coded beads conjugated with cytokine antibodies.

Table S1

| <b>Cell Line</b> | <b>Position</b> | <b>Description</b> |
|------------------|-----------------|--------------------|
| <b>GIC-16</b>    | Null            | Deletion           |
| <b>GIC-20</b>    | 73 C>G          | missense           |
| <b>GIC-23</b>    | 197 G>A         | novel              |
| <b>GIC-387</b>   | 97 C>G, 38 A>G  | novel              |
| <b>LN229</b>     | 176 C>T         | missense           |
| <b>LNZ308</b>    | Null            | Deletion           |
| <b>SF767</b>     | WT              |                    |
| <b>U87MG</b>     | WT              |                    |

Table S2

| <b>UP</b>     |                |               |                  |                |
|---------------|----------------|---------------|------------------|----------------|
| <b>Symbol</b> | <b>miR-182</b> | <b>Co-miR</b> | <b>Log2ratio</b> | <b>p-value</b> |
| KIAA1199      | 4192.633       | 96.255        | 5.445            | 0.016          |
| RARRES2       | 3980.756       | 91.870        | 5.437            | 0.014          |
| HLA-A29.1     | 3690.833       | 106.554       | 5.114            | 0.031          |
| A2M           | 2285.761       | 87.437        | 4.708            | 0.017          |
| KRT17         | 2268.762       | 96.833        | 4.550            | 0.005          |
| IER3          | 3394.907       | 146.362       | 4.536            | 0.041          |
| LGALS7B       | 1922.359       | 87.676        | 4.455            | 0.000          |
| TPM2          | 3199.069       | 148.325       | 4.431            | 0.021          |
| COL22A1       | 2121.007       | 103.768       | 4.353            | 0.021          |
| LPHN2         | 1348.671       | 88.623        | 3.928            | 0.028          |
| APOE          | 1762.114       | 121.852       | 3.854            | 0.047          |
| LPL           | 1363.866       | 100.510       | 3.762            | 0.031          |
| CHI3L1        | 4471.837       | 344.023       | 3.700            | 0.013          |
| CMYA5         | 1169.671       | 93.983        | 3.638            | 0.007          |
| ARHGDI3       | 1383.957       | 114.069       | 3.601            | 0.010          |
| IGSF1         | 1090.188       | 89.889        | 3.600            | 0.038          |
| LPPR4         | 1176.693       | 98.201        | 3.583            | 0.014          |
| EGR2          | 2384.552       | 204.803       | 3.541            | 0.015          |
| LGALS7        | 1109.113       | 95.608        | 3.536            | 0.004          |
| FAT1          | 995.526        | 92.400        | 3.430            | 0.010          |
| QPCT          | 1072.209       | 107.855       | 3.313            | 0.012          |
| MTAP          | 926.470        | 94.813        | 3.289            | 0.011          |
| LOC728910     | 924.541        | 94.964        | 3.283            | 0.000          |
| LOC653499     | 850.356        | 88.857        | 3.259            | 0.000          |
| VCX           | 801.910        | 86.865        | 3.207            | 0.001          |
| S100A4        | 12500.843      | 1371.653      | 3.188            | 0.001          |
| COL6A1        | 4854.119       | 533.386       | 3.186            | 0.019          |
| PDPN          | 1759.519       | 196.074       | 3.166            | 0.001          |
| GPM6B         | 2810.805       | 320.287       | 3.134            | 0.011          |
| FLJ30058      | 796.994        | 91.298        | 3.126            | 0.048          |
| VCX-C         | 801.460        | 91.852        | 3.125            | 0.002          |
| S100A9        | 852.573        | 105.143       | 3.019            | 0.000          |
| THBS4         | 897.234        | 112.955       | 2.990            | 0.002          |
| TYRO3         | 1440.967       | 185.205       | 2.960            | 0.014          |
| CYBA          | 755.710        | 97.494        | 2.954            | 0.007          |
| CELSR2        | 1584.641       | 208.657       | 2.925            | 0.029          |
| EFHD1         | 1304.506       | 173.767       | 2.908            | 0.004          |
| KRT17P3       | 741.882        | 99.650        | 2.896            | 0.007          |
| ALCAM         | 2691.750       | 364.522       | 2.884            | 0.030          |
| PTPRF         | 1589.600       | 217.115       | 2.872            | 0.014          |
| LOC642362     | 641.530        | 91.761        | 2.806            | 0.042          |
| CHRNA9        | 699.918        | 102.283       | 2.775            | 0.021          |
| RPL37A        | 5148.129       | 765.858       | 2.749            | 0.005          |

Table S2

|                  |          |          |       |       |
|------------------|----------|----------|-------|-------|
| <b>IGFBP3</b>    | 1972.410 | 304.157  | 2.697 | 0.014 |
| <b>LOC653192</b> | 589.065  | 94.464   | 2.641 | 0.050 |
| <b>PDZK1P1</b>   | 580.332  | 93.115   | 2.640 | 0.024 |
| <b>MGC18216</b>  | 849.323  | 140.484  | 2.596 | 0.007 |
| <b>S100A8</b>    | 727.025  | 121.278  | 2.584 | 0.002 |
| <b>HS.538259</b> | 1053.113 | 175.737  | 2.583 | 0.021 |
| <b>NOV</b>       | 590.802  | 98.828   | 2.580 | 0.012 |
| <b>MT1F</b>      | 915.211  | 154.073  | 2.570 | 0.006 |
| <b>SULF1</b>     | 556.954  | 96.041   | 2.536 | 0.007 |
| <b>CH25H</b>     | 579.523  | 99.953   | 2.536 | 0.024 |
| <b>MT1E</b>      | 2238.895 | 387.326  | 2.531 | 0.004 |
| <b>RBP1</b>      | 3567.580 | 618.958  | 2.527 | 0.010 |
| <b>CDKN2A</b>    | 500.656  | 92.174   | 2.441 | 0.001 |
| <b>MX1</b>       | 3244.922 | 605.860  | 2.421 | 0.009 |
| <b>VSNL1</b>     | 1305.676 | 247.483  | 2.399 | 0.041 |
| <b>CTHRC1</b>    | 981.220  | 186.623  | 2.394 | 0.011 |
| <b>CPE</b>       | 603.836  | 114.968  | 2.393 | 0.008 |
| <b>FLRT2</b>     | 514.909  | 98.419   | 2.387 | 0.008 |
| <b>SEMA6A</b>    | 817.514  | 156.663  | 2.384 | 0.000 |
| <b>PNPO</b>      | 2885.409 | 557.408  | 2.372 | 0.028 |
| <b>PAGE2B</b>    | 481.455  | 94.360   | 2.351 | 0.005 |
| <b>COL6A2</b>    | 1013.982 | 199.397  | 2.346 | 0.007 |
| <b>IL8</b>       | 696.873  | 138.418  | 2.332 | 0.013 |
| <b>PCSK1</b>     | 677.124  | 137.155  | 2.304 | 0.010 |
| <b>PAGE5</b>     | 452.243  | 91.715   | 2.302 | 0.004 |
| <b>JMJD8</b>     | 1064.105 | 219.406  | 2.278 | 0.001 |
| <b>KRT16</b>     | 436.909  | 91.290   | 2.259 | 0.019 |
| <b>RAB40B</b>    | 963.733  | 201.989  | 2.254 | 0.018 |
| <b>CSAG1</b>     | 448.504  | 94.536   | 2.246 | 0.005 |
| <b>PAGE2</b>     | 422.049  | 89.188   | 2.242 | 0.006 |
| <b>SEL1L3</b>    | 1641.580 | 347.428  | 2.240 | 0.009 |
| <b>LIPG</b>      | 1043.344 | 220.923  | 2.240 | 0.025 |
| <b>MCOLN2</b>    | 505.788  | 109.065  | 2.213 | 0.008 |
| <b>SLC4A11</b>   | 607.247  | 131.027  | 2.212 | 0.005 |
| <b>HS.12876</b>  | 915.457  | 199.899  | 2.195 | 0.002 |
| <b>PDZK1</b>     | 428.298  | 94.384   | 2.182 | 0.020 |
| <b>SLC10A4</b>   | 440.220  | 97.170   | 2.180 | 0.032 |
| <b>CKB</b>       | 4995.714 | 1120.678 | 2.156 | 0.003 |
| <b>PPAP2B</b>    | 1004.748 | 228.353  | 2.137 | 0.000 |
| <b>FRMD8</b>     | 1168.892 | 266.918  | 2.131 | 0.026 |
| <b>LOC284293</b> | 418.207  | 95.658   | 2.128 | 0.043 |
| <b>HS6ST2</b>    | 789.491  | 180.944  | 2.125 | 0.041 |
| <b>DUSP23</b>    | 1291.631 | 297.702  | 2.117 | 0.018 |
| <b>CDKN2B</b>    | 408.948  | 94.699   | 2.110 | 0.003 |
| <b>TRIP12</b>    | 555.586  | 129.752  | 2.098 | 0.010 |
| <b>ACPL2</b>     | 660.899  | 154.401  | 2.098 | 0.006 |
| <b>CADM3</b>     | 428.562  | 100.580  | 2.091 | 0.020 |

Table S2

|                  |          |          |       |       |
|------------------|----------|----------|-------|-------|
| <b>CCDC23</b>    | 1827.344 | 429.690  | 2.088 | 0.008 |
| <b>GPR37</b>     | 425.868  | 100.274  | 2.086 | 0.032 |
| <b>DARC</b>      | 387.801  | 91.689   | 2.080 | 0.041 |
| <b>UAP1</b>      | 1025.181 | 245.083  | 2.065 | 0.017 |
| <b>NPB</b>       | 408.305  | 97.745   | 2.063 | 0.003 |
| <b>RASL12</b>    | 399.677  | 95.863   | 2.060 | 0.023 |
| <b>SORL1</b>     | 576.885  | 139.499  | 2.048 | 0.001 |
| <b>LLGL1</b>     | 912.390  | 224.443  | 2.023 | 0.007 |
| <b>COL7A1</b>    | 570.645  | 141.562  | 2.011 | 0.040 |
| <b>GPR126</b>    | 391.059  | 98.118   | 1.995 | 0.018 |
| <b>KIAA1522</b>  | 570.245  | 143.683  | 1.989 | 0.006 |
| <b>DPYSL4</b>    | 654.214  | 166.524  | 1.974 | 0.034 |
| <b>SOX4</b>      | 692.632  | 179.883  | 1.945 | 0.005 |
| <b>NAB1</b>      | 761.983  | 198.367  | 1.942 | 0.027 |
| <b>USP11</b>     | 933.812  | 243.537  | 1.939 | 0.040 |
| <b>C6orf117</b>  | 534.131  | 139.656  | 1.935 | 0.016 |
| <b>GSPT2</b>     | 1867.537 | 489.515  | 1.932 | 0.001 |
| <b>TSHZ2</b>     | 671.270  | 176.377  | 1.928 | 0.006 |
| <b>SLFN11</b>    | 366.877  | 96.467   | 1.927 | 0.017 |
| <b>KIAA1598</b>  | 2508.967 | 660.940  | 1.925 | 0.012 |
| <b>SOX3</b>      | 5330.731 | 1406.283 | 1.922 | 0.033 |
| <b>MT1G</b>      | 698.473  | 184.490  | 1.921 | 0.001 |
| <b>C9orf95</b>   | 660.734  | 176.021  | 1.908 | 0.015 |
| <b>IMPA2</b>     | 820.569  | 218.782  | 1.907 | 0.039 |
| <b>GALNTL4</b>   | 513.468  | 137.614  | 1.900 | 0.040 |
| <b>GSTM1</b>     | 1536.799 | 413.726  | 1.893 | 0.002 |
| <b>KIAA0513</b>  | 696.932  | 187.969  | 1.891 | 0.029 |
| <b>HLA-C</b>     | 369.475  | 100.031  | 1.885 | 0.015 |
| <b>VCX3A</b>     | 336.958  | 91.407   | 1.882 | 0.002 |
| <b>AOF2</b>      | 2146.912 | 582.476  | 1.882 | 0.015 |
| <b>MTMR11</b>    | 854.583  | 232.605  | 1.877 | 0.020 |
| <b>LOC653506</b> | 439.078  | 119.717  | 1.875 | 0.006 |
| <b>HS.578401</b> | 342.090  | 93.376   | 1.873 | 0.024 |
| <b>C9orf24</b>   | 359.833  | 98.287   | 1.872 | 0.018 |
| <b>HS.505676</b> | 559.303  | 153.575  | 1.865 | 0.017 |
| <b>SOD2</b>      | 966.161  | 266.986  | 1.855 | 0.023 |
| <b>PLXNB1</b>    | 320.263  | 88.836   | 1.850 | 0.029 |
| <b>COL17A1</b>   | 398.350  | 111.048  | 1.843 | 0.009 |
| <b>ADAMTS1</b>   | 326.506  | 91.227   | 1.840 | 0.005 |
| <b>SOX13</b>     | 1317.498 | 368.886  | 1.837 | 0.003 |
| <b>SORT1</b>     | 1206.885 | 339.788  | 1.829 | 0.015 |
| <b>SHROOM2</b>   | 405.426  | 115.064  | 1.817 | 0.031 |
| <b>C20orf108</b> | 2802.413 | 798.892  | 1.811 | 0.043 |
| <b>CYB5R2</b>    | 1013.664 | 289.903  | 1.806 | 0.002 |
| <b>MAGEA6</b>    | 320.683  | 93.051   | 1.785 | 0.011 |
| <b>BTBD6</b>     | 1109.720 | 322.643  | 1.782 | 0.014 |
| <b>ARHGEF4</b>   | 391.535  | 113.978  | 1.780 | 0.013 |

Table S2

|           |           |          |       |       |
|-----------|-----------|----------|-------|-------|
| ZNF436    | 478.152   | 139.629  | 1.776 | 0.019 |
| HS.537002 | 311.188   | 91.803   | 1.761 | 0.009 |
| PRRX2     | 360.850   | 107.374  | 1.749 | 0.013 |
| SERPINA1  | 312.189   | 93.167   | 1.745 | 0.017 |
| WWC3      | 641.142   | 193.446  | 1.729 | 0.005 |
| C20orf127 | 599.722   | 181.053  | 1.728 | 0.002 |
| SPON1     | 445.850   | 135.388  | 1.719 | 0.029 |
| ST8SIA2   | 454.284   | 138.774  | 1.711 | 0.032 |
| EFNA1     | 1459.793  | 447.653  | 1.705 | 0.005 |
| GTPBP6    | 1203.997  | 369.374  | 1.705 | 0.000 |
| VANGL2    | 293.880   | 90.403   | 1.701 | 0.040 |
| SIPA1L2   | 775.592   | 238.797  | 1.700 | 0.003 |
| APOBEC3G  | 679.062   | 212.727  | 1.675 | 0.032 |
| RAB7B     | 1035.033  | 326.502  | 1.665 | 0.038 |
| SNAI2     | 501.274   | 158.183  | 1.664 | 0.017 |
| EPHB4     | 871.764   | 275.725  | 1.661 | 0.018 |
| CXCL1     | 315.798   | 99.949   | 1.660 | 0.005 |
| LOC653419 | 307.236   | 98.946   | 1.635 | 0.003 |
| GPC1      | 820.440   | 264.923  | 1.631 | 0.024 |
| CCDC136   | 648.400   | 210.500  | 1.623 | 0.000 |
| NUDT11    | 575.643   | 187.865  | 1.615 | 0.022 |
| EFCAB4A   | 368.120   | 120.366  | 1.613 | 0.042 |
| MRPS6     | 11763.760 | 3870.352 | 1.604 | 0.000 |
| ZBTB42    | 453.095   | 149.262  | 1.602 | 0.014 |
| ITGAV     | 2355.318  | 777.094  | 1.600 | 0.021 |
| RHOD      | 448.268   | 148.148  | 1.597 | 0.033 |
| KCNMB4    | 281.942   | 93.522   | 1.592 | 0.030 |
| LRRC8D    | 520.730   | 173.093  | 1.589 | 0.007 |
| EVL       | 1882.422  | 629.528  | 1.580 | 0.009 |
| CSAG3B    | 268.639   | 90.217   | 1.574 | 0.016 |
| MAGEA12   | 272.276   | 91.598   | 1.572 | 0.004 |
| OLFML2A   | 780.034   | 262.600  | 1.571 | 0.000 |
| RASSF7    | 708.210   | 238.982  | 1.567 | 0.000 |
| ADRA1B    | 427.368   | 144.520  | 1.564 | 0.017 |
| NOTCH3    | 311.465   | 105.342  | 1.564 | 0.028 |
| LEPREL1   | 461.595   | 157.451  | 1.552 | 0.005 |
| NBL1      | 1235.045  | 424.751  | 1.540 | 0.001 |
| PTK2B     | 333.949   | 115.705  | 1.529 | 0.015 |
| CHIC2     | 1202.674  | 418.808  | 1.522 | 0.047 |
| MT1M      | 272.507   | 94.913   | 1.522 | 0.021 |
| PLIN2     | 328.926   | 115.235  | 1.513 | 0.009 |
| CENPV     | 297.719   | 104.487  | 1.511 | 0.008 |
| C11orf74  | 490.041   | 172.110  | 1.510 | 0.009 |
| FGFRL1    | 656.732   | 232.664  | 1.497 | 0.039 |
| UGCGL2    | 366.017   | 130.054  | 1.493 | 0.011 |
| LOC728431 | 372.659   | 132.586  | 1.491 | 0.011 |
| OSTF1     | 2083.561  | 747.507  | 1.479 | 0.008 |

Table S2

|                  |          |          |       |       |
|------------------|----------|----------|-------|-------|
| <b>TRIB1</b>     | 749.290  | 270.564  | 1.470 | 0.019 |
| <b>C20orf45</b>  | 790.948  | 285.623  | 1.469 | 0.005 |
| <b>HS.444785</b> | 277.575  | 100.332  | 1.468 | 0.046 |
| <b>RAC2</b>      | 248.951  | 90.228   | 1.464 | 0.015 |
| <b>MAP7</b>      | 292.230  | 106.469  | 1.457 | 0.003 |
| <b>IGFBP7</b>    | 4590.103 | 1674.043 | 1.455 | 0.013 |
| <b>STARD10</b>   | 376.268  | 138.020  | 1.447 | 0.046 |
| <b>UCA1</b>      | 265.467  | 97.592   | 1.444 | 0.046 |
| <b>CA5B</b>      | 526.672  | 194.072  | 1.440 | 0.022 |
| <b>PDGFRB</b>    | 494.215  | 182.201  | 1.440 | 0.046 |
| <b>KIAA0247</b>  | 1062.333 | 391.969  | 1.438 | 0.044 |
| <b>RND2</b>      | 428.373  | 158.119  | 1.438 | 0.000 |
| <b>UCHL1</b>     | 1688.432 | 623.234  | 1.438 | 0.028 |
| <b>LOC730098</b> | 293.550  | 108.406  | 1.437 | 0.023 |
| <b>ZNF589</b>    | 281.334  | 104.331  | 1.431 | 0.005 |
| <b>PTN</b>       | 803.883  | 298.273  | 1.430 | 0.036 |
| <b>GSTT2B</b>    | 271.478  | 100.739  | 1.430 | 0.001 |
| <b>UBA1</b>      | 4557.546 | 1695.751 | 1.426 | 0.011 |
| <b>LOC650517</b> | 250.095  | 93.115   | 1.425 | 0.006 |
| <b>PQLC1</b>     | 923.104  | 344.098  | 1.424 | 0.000 |
| <b>HS.4892</b>   | 490.653  | 183.151  | 1.422 | 0.028 |
| <b>GFOD1</b>     | 441.140  | 165.771  | 1.412 | 0.005 |
| <b>HS.538962</b> | 631.669  | 237.514  | 1.411 | 0.025 |
| <b>MTE</b>       | 714.936  | 269.398  | 1.408 | 0.000 |
| <b>FLJ22536</b>  | 264.753  | 99.939   | 1.406 | 0.020 |
| <b>CASK</b>      | 620.945  | 234.591  | 1.404 | 0.005 |
| <b>CXCR4</b>     | 387.428  | 146.950  | 1.399 | 0.001 |
| <b>COL4A6</b>    | 411.921  | 156.916  | 1.392 | 0.011 |
| <b>GSTM2</b>     | 1383.943 | 527.503  | 1.392 | 0.006 |
| <b>DDAH2</b>     | 418.404  | 159.834  | 1.388 | 0.037 |
| <b>ZNF518B</b>   | 253.724  | 97.239   | 1.384 | 0.004 |
| <b>CYB5A</b>     | 337.330  | 129.333  | 1.383 | 0.003 |
| <b>LOC648638</b> | 751.367  | 288.163  | 1.383 | 0.039 |
| <b>HS.50125</b>  | 324.344  | 124.936  | 1.376 | 0.014 |
| <b>RCN1</b>      | 1992.942 | 773.448  | 1.366 | 0.040 |
| <b>CD1D</b>      | 255.083  | 99.014   | 1.365 | 0.014 |
| <b>PPFIA1</b>    | 571.329  | 222.634  | 1.360 | 0.002 |
| <b>INTS3</b>     | 649.775  | 254.095  | 1.355 | 0.016 |
| <b>GRM8</b>      | 242.890  | 95.006   | 1.354 | 0.019 |
| <b>LMO4</b>      | 2862.670 | 1122.286 | 1.351 | 0.047 |
| <b>AXL</b>       | 809.357  | 317.585  | 1.350 | 0.019 |
| <b>FN3KRP</b>    | 1299.232 | 509.911  | 1.349 | 0.027 |
| <b>PTOV1</b>     | 2249.495 | 883.697  | 1.348 | 0.013 |
| <b>MED28</b>     | 567.554  | 223.255  | 1.346 | 0.000 |
| <b>MFGE8</b>     | 3935.878 | 1548.993 | 1.345 | 0.019 |
| <b>XPR1</b>      | 1081.159 | 425.575  | 1.345 | 0.016 |
| <b>PIPOX</b>     | 452.327  | 178.392  | 1.342 | 0.038 |



Table S2

|                   |          |         |       |       |
|-------------------|----------|---------|-------|-------|
| <b>PURB</b>       | 1821.861 | 720.062 | 1.339 | 0.001 |
| <b>PTGS2</b>      | 231.069  | 91.435  | 1.338 | 0.024 |
| <b>SEPN1</b>      | 1608.859 | 639.604 | 1.331 | 0.012 |
| <b>ST6GALNAC5</b> | 213.143  | 85.278  | 1.322 | 0.016 |
| <b>CLIP3</b>      | 1134.811 | 456.349 | 1.314 | 0.021 |
| <b>C20orf27</b>   | 772.740  | 311.276 | 1.312 | 0.017 |
| <b>UBE1</b>       | 1828.287 | 736.620 | 1.312 | 0.041 |
| <b>ZNF362</b>     | 390.112  | 157.252 | 1.311 | 0.017 |
| <b>ITPR1</b>      | 485.862  | 196.121 | 1.309 | 0.033 |
| <b>ACAA2</b>      | 499.334  | 201.788 | 1.307 | 0.003 |
| <b>FAM89A</b>     | 496.371  | 200.661 | 1.307 | 0.019 |
| <b>POMGNT1</b>    | 2023.266 | 818.826 | 1.305 | 0.010 |
| <b>FHL3</b>       | 300.339  | 122.029 | 1.299 | 0.020 |
| <b>C1orf86</b>    | 521.087  | 211.948 | 1.298 | 0.000 |
| <b>NXT1</b>       | 1016.467 | 413.533 | 1.297 | 0.002 |
| <b>GSTM4</b>      | 316.797  | 128.907 | 1.297 | 0.004 |
| <b>GSTT2</b>      | 250.277  | 102.068 | 1.294 | 0.000 |
| <b>PGM2L1</b>     | 724.165  | 295.525 | 1.293 | 0.015 |
| <b>LOC285556</b>  | 250.794  | 102.662 | 1.289 | 0.033 |
| <b>HS.127310</b>  | 2013.877 | 824.584 | 1.288 | 0.011 |
| <b>COL4A5</b>     | 1003.378 | 411.254 | 1.287 | 0.037 |
| <b>TNKS1BP1</b>   | 462.710  | 189.655 | 1.287 | 0.010 |
| <b>C1orf198</b>   | 589.314  | 241.592 | 1.286 | 0.004 |
| <b>BGN</b>        | 324.751  | 133.196 | 1.286 | 0.034 |
| <b>ISG15</b>      | 983.223  | 403.371 | 1.285 | 0.024 |
| <b>FNBP1</b>      | 897.614  | 368.849 | 1.283 | 0.000 |
| <b>C1orf115</b>   | 448.649  | 185.016 | 1.278 | 0.035 |
| <b>LHFPL2</b>     | 1611.304 | 665.469 | 1.276 | 0.001 |
| <b>LOC731954</b>  | 231.566  | 95.657  | 1.275 | 0.033 |
| <b>IFI16</b>      | 1310.548 | 541.582 | 1.275 | 0.019 |
| <b>TSPAN7</b>     | 998.948  | 413.652 | 1.272 | 0.007 |
| <b>EDG4</b>       | 301.602  | 124.985 | 1.271 | 0.003 |
| <b>KCNK13</b>     | 232.386  | 96.312  | 1.271 | 0.008 |
| <b>LOC644743</b>  | 286.549  | 118.887 | 1.269 | 0.025 |
| <b>LEPRE1</b>     | 797.616  | 331.054 | 1.269 | 0.017 |
| <b>FRAS1</b>      | 227.642  | 94.564  | 1.267 | 0.007 |
| <b>LOC647037</b>  | 584.026  | 242.943 | 1.265 | 0.040 |
| <b>LARGE</b>      | 430.404  | 179.546 | 1.261 | 0.015 |
| <b>SLC39A14</b>   | 727.569  | 303.841 | 1.260 | 0.002 |
| <b>YPEL2</b>      | 259.615  | 108.951 | 1.253 | 0.009 |
| <b>FGD1</b>       | 449.764  | 188.780 | 1.252 | 0.018 |
| <b>TGFB3</b>      | 313.130  | 131.504 | 1.252 | 0.008 |
| <b>B3GALT6</b>    | 473.794  | 199.051 | 1.251 | 0.013 |
| <b>LUZP1</b>      | 1386.553 | 584.102 | 1.247 | 0.018 |
| <b>TMEM16A</b>    | 220.766  | 93.024  | 1.247 | 0.015 |
| <b>ATP9A</b>      | 766.782  | 324.244 | 1.242 | 0.003 |
| <b>MAGEC2</b>     | 222.893  | 94.315  | 1.241 | 0.011 |

Table S2

|              |          |          |       |       |
|--------------|----------|----------|-------|-------|
| TPD52L1      | 1208.014 | 512.159  | 1.238 | 0.009 |
| RERE         | 498.134  | 211.329  | 1.237 | 0.013 |
| LOC654096    | 416.156  | 176.725  | 1.236 | 0.009 |
| PKD2         | 709.688  | 301.648  | 1.234 | 0.037 |
| KRT8         | 355.469  | 151.400  | 1.231 | 0.004 |
| OSBPL10      | 400.836  | 171.038  | 1.229 | 0.030 |
| PMP22        | 1182.366 | 506.357  | 1.223 | 0.022 |
| CNN2         | 534.028  | 229.205  | 1.220 | 0.000 |
| GSTA4        | 701.784  | 301.861  | 1.217 | 0.025 |
| NQO2         | 799.007  | 343.738  | 1.217 | 0.009 |
| SCD5         | 439.148  | 189.238  | 1.215 | 0.026 |
| ROPN1        | 222.520  | 95.899   | 1.214 | 0.020 |
| COL3A1       | 213.003  | 91.920   | 1.212 | 0.002 |
| SVEP1        | 222.747  | 96.356   | 1.209 | 0.041 |
| DSCR8        | 214.624  | 92.857   | 1.209 | 0.016 |
| PDGFRA       | 220.193  | 95.327   | 1.208 | 0.001 |
| STRA13       | 1725.826 | 749.313  | 1.204 | 0.004 |
| BTG3         | 1567.391 | 682.132  | 1.200 | 0.012 |
| SLC9A1       | 604.392  | 263.257  | 1.199 | 0.000 |
| DAB2         | 322.688  | 141.155  | 1.193 | 0.044 |
| C11orf75     | 583.761  | 255.807  | 1.190 | 0.006 |
| PECI         | 1646.100 | 723.331  | 1.186 | 0.001 |
| NID2         | 234.970  | 103.281  | 1.186 | 0.044 |
| SWAP70       | 773.161  | 342.159  | 1.176 | 0.019 |
| C7orf41      | 479.238  | 212.304  | 1.175 | 0.040 |
| LOC100133861 | 301.936  | 133.936  | 1.173 | 0.024 |
| SERINC2      | 287.018  | 127.489  | 1.171 | 0.010 |
| COL11A1      | 205.672  | 91.671   | 1.166 | 0.020 |
| IFNGR1       | 921.107  | 411.566  | 1.162 | 0.038 |
| LOC730278    | 5031.871 | 2264.088 | 1.152 | 0.048 |
| POLA1        | 510.810  | 230.532  | 1.148 | 0.033 |
| BAT5         | 636.375  | 288.321  | 1.142 | 0.047 |
| PPCS         | 1312.782 | 597.116  | 1.137 | 0.016 |
| MAF          | 307.346  | 139.854  | 1.136 | 0.007 |
| LOC100132801 | 224.589  | 102.503  | 1.132 | 0.018 |
| IL18         | 4152.369 | 1897.357 | 1.130 | 0.005 |
| PFKP         | 2489.004 | 1139.198 | 1.128 | 0.011 |
| LOC440359    | 1204.319 | 552.210  | 1.125 | 0.000 |
| PDE8B        | 210.720  | 96.665   | 1.124 | 0.012 |
| SESN3        | 255.785  | 117.529  | 1.122 | 0.005 |
| HES4         | 1480.247 | 680.548  | 1.121 | 0.000 |
| PELI2        | 310.489  | 142.945  | 1.119 | 0.023 |
| FAM50B       | 193.943  | 89.341   | 1.118 | 0.015 |
| DNAJB2       | 974.070  | 448.895  | 1.118 | 0.041 |
| SARS         | 1215.410 | 561.552  | 1.114 | 0.025 |
| FAM108C1     | 688.608  | 318.403  | 1.113 | 0.019 |
| MAP3K6       | 650.995  | 301.068  | 1.113 | 0.023 |

Table S2

|                  |          |         |       |       |
|------------------|----------|---------|-------|-------|
| <b>ZNF324</b>    | 234.606  | 108.584 | 1.111 | 0.014 |
| <b>CITED4</b>    | 203.881  | 94.401  | 1.111 | 0.015 |
| <b>USP1</b>      | 394.780  | 183.542 | 1.105 | 0.013 |
| <b>CHD9</b>      | 746.491  | 347.320 | 1.104 | 0.008 |
| <b>FANCE</b>     | 326.077  | 152.108 | 1.100 | 0.003 |
| <b>STX3</b>      | 382.688  | 178.640 | 1.099 | 0.019 |
| <b>VGLL4</b>     | 1151.743 | 539.345 | 1.095 | 0.020 |
| <b>S100A11</b>   | 2041.144 | 957.791 | 1.092 | 0.025 |
| <b>IQGAP2</b>    | 223.973  | 105.263 | 1.089 | 0.009 |
| <b>SLC38A2</b>   | 1589.026 | 747.678 | 1.088 | 0.011 |
| <b>AADAT</b>     | 219.575  | 103.383 | 1.087 | 0.034 |
| <b>ADO</b>       | 845.758  | 398.214 | 1.087 | 0.004 |
| <b>ACP2</b>      | 438.342  | 206.438 | 1.086 | 0.002 |
| <b>LOC651064</b> | 1345.184 | 633.869 | 1.086 | 0.042 |
| <b>LFNG</b>      | 204.727  | 96.713  | 1.082 | 0.005 |
| <b>PDLIM1</b>    | 499.149  | 235.822 | 1.082 | 0.033 |
| <b>ACTA2</b>     | 449.094  | 212.502 | 1.080 | 0.049 |
| <b>CALB1</b>     | 199.222  | 94.275  | 1.079 | 0.039 |
| <b>BACE1</b>     | 282.619  | 133.743 | 1.079 | 0.018 |
| <b>IRF7</b>      | 244.383  | 115.736 | 1.078 | 0.021 |
| <b>CCDC58</b>    | 487.097  | 230.702 | 1.078 | 0.043 |
| <b>PCOLCE</b>    | 236.146  | 112.029 | 1.076 | 0.046 |
| <b>PAQR4</b>     | 578.882  | 274.788 | 1.075 | 0.033 |
| <b>CYP4V2</b>    | 345.076  | 164.311 | 1.070 | 0.042 |
| <b>NT5DC2</b>    | 603.138  | 287.536 | 1.069 | 0.014 |
| <b>FNTB</b>      | 431.234  | 205.946 | 1.066 | 0.030 |
| <b>SPG3A</b>     | 570.127  | 272.825 | 1.063 | 0.015 |
| <b>SFN</b>       | 199.386  | 95.419  | 1.063 | 0.042 |
| <b>HDC</b>       | 191.751  | 92.009  | 1.059 | 0.020 |
| <b>LDB2</b>      | 779.317  | 374.377 | 1.058 | 0.015 |
| <b>ISOC2</b>     | 1026.831 | 494.414 | 1.054 | 0.009 |
| <b>CDK5</b>      | 505.285  | 243.306 | 1.054 | 0.000 |
| <b>ZBED1</b>     | 703.798  | 338.999 | 1.054 | 0.001 |
| <b>ANK1</b>      | 195.695  | 94.548  | 1.049 | 0.020 |
| <b>CASZ1</b>     | 198.339  | 95.871  | 1.049 | 0.001 |
| <b>PXMP2</b>     | 426.426  | 206.579 | 1.046 | 0.019 |
| <b>ATAD3A</b>    | 473.842  | 229.713 | 1.045 | 0.025 |
| <b>HS.193406</b> | 471.779  | 228.744 | 1.044 | 0.009 |
| <b>GLCE</b>      | 539.219  | 261.570 | 1.044 | 0.003 |
| <b>C20orf11</b>  | 1198.563 | 581.773 | 1.043 | 0.008 |
| <b>KIF2A</b>     | 555.551  | 269.858 | 1.042 | 0.033 |
| <b>RND3</b>      | 459.578  | 223.516 | 1.040 | 0.005 |
| <b>GAD2</b>      | 189.293  | 92.123  | 1.039 | 0.047 |
| <b>CNKSR3</b>    | 847.772  | 412.713 | 1.039 | 0.031 |
| <b>ENDOD1</b>    | 1251.878 | 610.619 | 1.036 | 0.048 |
| <b>LEF1</b>      | 236.376  | 115.539 | 1.033 | 0.001 |
| <b>TIMP3</b>     | 252.687  | 123.561 | 1.032 | 0.005 |

Table S2

|                  |          |          |       |       |
|------------------|----------|----------|-------|-------|
| <b>CLSTN1</b>    | 1311.205 | 641.449  | 1.031 | 0.017 |
| <b>LOC151162</b> | 881.582  | 431.373  | 1.031 | 0.040 |
| <b>LOC400657</b> | 208.806  | 102.455  | 1.027 | 0.017 |
| <b>TMEM62</b>    | 399.581  | 196.069  | 1.027 | 0.010 |
| <b>MIR886</b>    | 341.533  | 167.590  | 1.027 | 0.001 |
| <b>PLEKHG3</b>   | 290.738  | 143.097  | 1.023 | 0.015 |
| <b>TMEM39B</b>   | 532.306  | 262.125  | 1.022 | 0.001 |
| <b>ANKRD57</b>   | 525.049  | 258.740  | 1.021 | 0.049 |
| <b>MYL9</b>      | 239.488  | 118.223  | 1.018 | 0.004 |
| <b>NXN</b>       | 211.169  | 104.288  | 1.018 | 0.001 |
| <b>WDR8</b>      | 469.689  | 232.127  | 1.017 | 0.039 |
| <b>RASD2</b>     | 214.388  | 106.288  | 1.012 | 0.021 |
| <b>CNDP2</b>     | 2091.190 | 1036.829 | 1.012 | 0.038 |
| <b>FURIN</b>     | 334.128  | 166.505  | 1.005 | 0.007 |
| <b>CMTM8</b>     | 1363.676 | 679.895  | 1.004 | 0.025 |



Table S2

| <b>DOWN</b>   |                |               |                  |                |
|---------------|----------------|---------------|------------------|----------------|
| <b>Symbol</b> | <b>miR-182</b> | <b>Co-miR</b> | <b>Log2ratio</b> | <b>p-value</b> |
| RAPGEF5       | 168.392        | 336.853       | -1.000           | 0.022          |
| MAMDC2        | 163.887        | 328.312       | -1.002           | 0.000          |
| MRPS27        | 508.866        | 1020.020      | -1.003           | 0.001          |
| LOC387882     | 370.557        | 742.807       | -1.003           | 0.010          |
| TTC1          | 250.907        | 503.740       | -1.006           | 0.001          |
| TRAPPC5       | 512.933        | 1030.754      | -1.007           | 0.004          |
| HS.356079     | 176.039        | 353.800       | -1.007           | 0.005          |
| PRICKLE2      | 411.715        | 827.781       | -1.008           | 0.000          |
| QDPR          | 619.917        | 1247.746      | -1.009           | 0.010          |
| DSE           | 109.080        | 219.817       | -1.011           | 0.000          |
| C10orf141     | 94.264         | 189.981       | -1.011           | 0.003          |
| PCYOX1L       | 114.621        | 231.077       | -1.012           | 0.002          |
| SLC7A5        | 550.389        | 1109.592      | -1.012           | 0.010          |
| MRPL22        | 846.536        | 1709.454      | -1.014           | 0.000          |
| NUSAP1        | 486.722        | 983.495       | -1.015           | 0.030          |
| ZMAT2         | 418.887        | 847.271       | -1.016           | 0.001          |
| TNFAIP8L3     | 101.449        | 205.434       | -1.018           | 0.001          |
| ASTN1         | 90.181         | 182.657       | -1.018           | 0.000          |
| TJP2          | 95.866         | 194.446       | -1.020           | 0.002          |
| TNFRSF1A      | 677.815        | 1374.908      | -1.020           | 0.001          |
| PBK           | 386.854        | 785.366       | -1.022           | 0.017          |
| LOC644934     | 1332.076       | 2705.211      | -1.022           | 0.017          |
| CISD1         | 1448.818       | 2943.479      | -1.023           | 0.004          |
| BST2          | 412.123        | 838.904       | -1.025           | 0.003          |
| SMOX          | 242.507        | 493.786       | -1.026           | 0.009          |
| EEF2          | 3404.565       | 6933.629      | -1.026           | 0.001          |
| UBE2N         | 378.976        | 772.707       | -1.028           | 0.005          |
| MED27         | 257.577        | 525.228       | -1.028           | 0.000          |
| DLGAP5        | 301.793        | 615.610       | -1.028           | 0.007          |
| VGF           | 106.303        | 216.916       | -1.029           | 0.000          |
| PHCA          | 347.172        | 708.632       | -1.029           | 0.023          |
| CAPN5         | 289.401        | 590.843       | -1.030           | 0.011          |
| GMPR2         | 247.524        | 505.482       | -1.030           | 0.018          |
| SH3GLB2       | 824.627        | 1686.281      | -1.032           | 0.006          |
| PPP2R2B       | 244.886        | 501.400       | -1.034           | 0.013          |
| LPAR1         | 93.558         | 191.612       | -1.034           | 0.002          |
| CCNA1         | 182.245        | 373.281       | -1.034           | 0.006          |
| C9orf167      | 106.737        | 218.767       | -1.035           | 0.011          |
| PIP4K2A       | 542.028        | 1111.391      | -1.036           | 0.003          |
| CENPM         | 176.952        | 362.981       | -1.037           | 0.001          |
| LOC441089     | 569.115        | 1167.753      | -1.037           | 0.000          |
| KCNJ2         | 89.367         | 183.528       | -1.038           | 0.002          |
| CDKN2C        | 101.068        | 207.635       | -1.039           | 0.000          |

Table S2

|                  |          |          |        |       |
|------------------|----------|----------|--------|-------|
| <b>LOC284998</b> | 116.128  | 238.813  | -1.040 | 0.001 |
| <b>CDC25C</b>    | 121.862  | 251.055  | -1.043 | 0.003 |
| <b>ADAM19</b>    | 415.908  | 857.393  | -1.044 | 0.001 |
| <b>FAM96B</b>    | 808.404  | 1667.236 | -1.044 | 0.003 |
| <b>HMGCR</b>     | 976.828  | 2014.705 | -1.044 | 0.017 |
| <b>CDC20</b>     | 1507.431 | 3112.031 | -1.046 | 0.004 |
| <b>FAM70B</b>    | 96.011   | 198.355  | -1.047 | 0.001 |
| <b>GTSE1</b>     | 126.078  | 260.921  | -1.049 | 0.003 |
| <b>LYRM5</b>     | 314.935  | 652.824  | -1.052 | 0.015 |
| <b>TLN1</b>      | 226.638  | 469.836  | -1.052 | 0.001 |
| <b>RPS26</b>     | 662.953  | 1375.792 | -1.053 | 0.014 |
| <b>SRPX</b>      | 3573.827 | 7422.042 | -1.054 | 0.020 |
| <b>HS.57079</b>  | 929.084  | 1929.910 | -1.055 | 0.001 |
| <b>PMAIP1</b>    | 131.009  | 272.162  | -1.055 | 0.003 |
| <b>EMP3</b>      | 1537.696 | 3195.470 | -1.055 | 0.001 |
| <b>PLS1</b>      | 156.691  | 325.672  | -1.055 | 0.007 |
| <b>CYB5R3</b>    | 1220.446 | 2537.006 | -1.056 | 0.000 |
| <b>HS.25318</b>  | 288.316  | 599.993  | -1.057 | 0.000 |
| <b>BCAS4</b>     | 169.008  | 351.768  | -1.058 | 0.002 |
| <b>COMT</b>      | 275.407  | 573.687  | -1.059 | 0.001 |
| <b>KIAA0367</b>  | 668.748  | 1393.041 | -1.059 | 0.014 |
| <b>SNORD32A</b>  | 100.404  | 209.244  | -1.059 | 0.000 |
| <b>CCNH</b>      | 210.631  | 440.479  | -1.064 | 0.000 |
| <b>UBE2T</b>     | 887.151  | 1859.430 | -1.068 | 0.000 |
| <b>MPP1</b>      | 239.526  | 502.437  | -1.069 | 0.001 |
| <b>SLC7A1</b>    | 668.450  | 1404.641 | -1.071 | 0.000 |
| <b>GMDS</b>      | 301.402  | 633.643  | -1.072 | 0.000 |
| <b>SIRPA</b>     | 94.230   | 198.398  | -1.074 | 0.013 |
| <b>PARP3</b>     | 186.323  | 392.348  | -1.074 | 0.001 |
| <b>HLA-DRB3</b>  | 389.024  | 820.753  | -1.077 | 0.000 |
| <b>PTHLH</b>     | 133.056  | 280.901  | -1.078 | 0.001 |
| <b>LOC399804</b> | 1020.407 | 2154.248 | -1.078 | 0.011 |
| <b>MBNL2</b>     | 126.180  | 266.396  | -1.078 | 0.001 |
| <b>CPNE1</b>     | 251.484  | 531.030  | -1.078 | 0.000 |
| <b>LOC642342</b> | 104.051  | 219.732  | -1.078 | 0.006 |
| <b>TRIP13</b>    | 356.304  | 753.315  | -1.080 | 0.005 |
| <b>BCL2L12</b>   | 179.847  | 381.703  | -1.086 | 0.003 |
| <b>GPN1</b>      | 565.965  | 1202.504 | -1.087 | 0.002 |
| <b>DNAJB1</b>    | 405.489  | 862.452  | -1.089 | 0.002 |
| <b>EPDR1</b>     | 862.038  | 1835.033 | -1.090 | 0.005 |
| <b>HRASLS</b>    | 95.811   | 204.144  | -1.091 | 0.005 |
| <b>KIAA1539</b>  | 187.369  | 399.251  | -1.091 | 0.000 |
| <b>AK3L1</b>     | 104.272  | 222.295  | -1.092 | 0.010 |
| <b>PLK1</b>      | 113.323  | 242.067  | -1.095 | 0.001 |
| <b>PRKAA1</b>    | 253.265  | 541.263  | -1.096 | 0.004 |
| <b>MAFB</b>      | 89.904   | 192.223  | -1.096 | 0.005 |
| <b>C20orf199</b> | 548.899  | 1173.604 | -1.096 | 0.005 |

Table S2

|                      |          |          |        |       |
|----------------------|----------|----------|--------|-------|
| <b>C18orf10</b>      | 362.509  | 775.598  | -1.097 | 0.006 |
| <b>C2orf32</b>       | 89.277   | 191.073  | -1.098 | 0.004 |
| <b>KCNMA1</b>        | 103.874  | 222.494  | -1.099 | 0.030 |
| <b>PAPPA</b>         | 222.199  | 477.271  | -1.103 | 0.001 |
| <b>IQCG</b>          | 144.621  | 311.147  | -1.105 | 0.002 |
| <b>KARS</b>          | 302.516  | 651.287  | -1.106 | 0.013 |
| <b>PLD1</b>          | 128.770  | 277.534  | -1.108 | 0.014 |
| <b>APRT</b>          | 440.947  | 950.763  | -1.108 | 0.005 |
| <b>WNT5A</b>         | 112.966  | 243.791  | -1.110 | 0.018 |
| <b>SLC16A9</b>       | 86.722   | 187.205  | -1.110 | 0.024 |
| <b>JAKMIP2</b>       | 92.856   | 200.608  | -1.111 | 0.028 |
| <b>C19orf62</b>      | 334.317  | 722.474  | -1.112 | 0.001 |
| <b>TANC1</b>         | 298.912  | 645.991  | -1.112 | 0.029 |
| <b>THBS2</b>         | 93.499   | 202.418  | -1.114 | 0.011 |
| <b>C10orf11</b>      | 88.873   | 192.469  | -1.115 | 0.011 |
| <b>UHRF2</b>         | 144.810  | 313.625  | -1.115 | 0.021 |
| <b>FAM84B</b>        | 424.643  | 921.380  | -1.118 | 0.003 |
| <b>RP11-529I10.4</b> | 202.735  | 439.903  | -1.118 | 0.022 |
| <b>CKAP2L</b>        | 240.738  | 522.537  | -1.118 | 0.001 |
| <b>LOC645166</b>     | 132.519  | 287.727  | -1.118 | 0.007 |
| <b>IGF2BP3</b>       | 373.168  | 810.377  | -1.119 | 0.025 |
| <b>GFPT2</b>         | 669.473  | 1456.391 | -1.121 | 0.014 |
| <b>TCEA3</b>         | 169.067  | 367.818  | -1.121 | 0.000 |
| <b>PRR7</b>          | 227.222  | 494.557  | -1.122 | 0.005 |
| <b>SYT11</b>         | 972.543  | 2117.779 | -1.123 | 0.001 |
| <b>FAM64A</b>        | 372.768  | 812.050  | -1.123 | 0.006 |
| <b>PREX1</b>         | 154.218  | 336.879  | -1.127 | 0.000 |
| <b>NMU</b>           | 191.406  | 418.249  | -1.128 | 0.045 |
| <b>KIF14</b>         | 191.686  | 420.639  | -1.134 | 0.011 |
| <b>AURKB</b>         | 281.198  | 618.349  | -1.137 | 0.002 |
| <b>MRPL54</b>        | 510.387  | 1123.498 | -1.138 | 0.005 |
| <b>RAI14</b>         | 724.196  | 1599.462 | -1.143 | 0.001 |
| <b>CDK7</b>          | 519.619  | 1148.030 | -1.144 | 0.001 |
| <b>TKT</b>           | 4324.259 | 9554.574 | -1.144 | 0.003 |
| <b>SEPX1</b>         | 850.370  | 1882.591 | -1.147 | 0.003 |
| <b>EMP1</b>          | 2572.895 | 5702.936 | -1.148 | 0.018 |
| <b>TPX2</b>          | 338.427  | 750.419  | -1.149 | 0.001 |
| <b>PCOLCE2</b>       | 108.477  | 241.292  | -1.153 | 0.000 |
| <b>RHOU</b>          | 89.262   | 198.735  | -1.155 | 0.003 |
| <b>NRIP3</b>         | 127.686  | 284.419  | -1.155 | 0.000 |
| <b>ANLN</b>          | 401.342  | 894.296  | -1.156 | 0.005 |
| <b>PREPL</b>         | 137.855  | 307.346  | -1.157 | 0.007 |
| <b>POLDIP3</b>       | 205.854  | 458.971  | -1.157 | 0.000 |
| <b>ETFB</b>          | 445.723  | 996.104  | -1.160 | 0.000 |
| <b>CKAP2</b>         | 163.870  | 366.260  | -1.160 | 0.003 |
| <b>NUDT7</b>         | 261.380  | 584.504  | -1.161 | 0.001 |
| <b>FAM176A</b>       | 89.356   | 199.876  | -1.161 | 0.013 |



Table S2

|                  |          |          |        |       |
|------------------|----------|----------|--------|-------|
| <b>LOC88523</b>  | 139.221  | 311.540  | -1.162 | 0.000 |
| <b>ENC1</b>      | 679.576  | 1520.777 | -1.162 | 0.029 |
| <b>CPS1</b>      | 92.846   | 207.911  | -1.163 | 0.000 |
| <b>SMAD3</b>     | 379.924  | 852.623  | -1.166 | 0.001 |
| <b>CLDN23</b>    | 100.188  | 224.860  | -1.166 | 0.004 |
| <b>SOX9</b>      | 311.445  | 699.869  | -1.168 | 0.026 |
| <b>HMGB2</b>     | 517.093  | 1163.409 | -1.170 | 0.021 |
| <b>CDCA3</b>     | 175.889  | 396.320  | -1.172 | 0.002 |
| <b>NQO1</b>      | 539.458  | 1217.418 | -1.174 | 0.004 |
| <b>D4S234E</b>   | 110.368  | 249.236  | -1.175 | 0.027 |
| <b>GPX3</b>      | 217.905  | 492.776  | -1.177 | 0.003 |
| <b>NUDT1</b>     | 243.227  | 550.201  | -1.178 | 0.000 |
| <b>PCCA</b>      | 172.130  | 390.142  | -1.181 | 0.009 |
| <b>DHX29</b>     | 326.385  | 739.930  | -1.181 | 0.020 |
| <b>ODZ4</b>      | 85.929   | 195.070  | -1.183 | 0.010 |
| <b>ID3</b>       | 125.193  | 284.651  | -1.185 | 0.021 |
| <b>B4GALT5</b>   | 1619.203 | 3682.184 | -1.185 | 0.001 |
| <b>DECR1</b>     | 1291.246 | 2938.615 | -1.186 | 0.004 |
| <b>DNAJC25</b>   | 172.971  | 393.871  | -1.187 | 0.003 |
| <b>C14orf78</b>  | 367.690  | 837.761  | -1.188 | 0.037 |
| <b>C5orf32</b>   | 531.251  | 1211.049 | -1.189 | 0.001 |
| <b>LTA4H</b>     | 692.275  | 1578.724 | -1.189 | 0.003 |
| <b>RPL13L</b>    | 160.272  | 366.215  | -1.192 | 0.004 |
| <b>C5orf39</b>   | 120.210  | 274.677  | -1.192 | 0.027 |
| <b>PFDN1</b>     | 587.489  | 1347.226 | -1.197 | 0.007 |
| <b>LOC646849</b> | 779.649  | 1789.133 | -1.198 | 0.005 |
| <b>CCL26</b>     | 105.527  | 242.482  | -1.200 | 0.000 |
| <b>NME5</b>      | 89.050   | 204.658  | -1.201 | 0.021 |
| <b>GLRX</b>      | 760.686  | 1749.175 | -1.201 | 0.001 |
| <b>LPXN</b>      | 196.866  | 452.709  | -1.201 | 0.015 |
| <b>TROAP</b>     | 173.648  | 399.519  | -1.202 | 0.008 |
| <b>CDH2</b>      | 780.126  | 1799.180 | -1.206 | 0.001 |
| <b>BEX5</b>      | 113.225  | 261.168  | -1.206 | 0.002 |
| <b>BTN3A2</b>    | 116.606  | 269.097  | -1.206 | 0.001 |
| <b>SRI</b>       | 237.791  | 548.797  | -1.207 | 0.001 |
| <b>CHPT1</b>     | 342.690  | 792.242  | -1.209 | 0.000 |
| <b>KIF20B</b>    | 219.007  | 506.525  | -1.210 | 0.021 |
| <b>LOC388796</b> | 272.973  | 632.177  | -1.212 | 0.000 |
| <b>LEPROT</b>    | 298.791  | 692.884  | -1.213 | 0.006 |
| <b>NDUFS4</b>    | 1614.923 | 3748.058 | -1.215 | 0.001 |
| <b>ITGA11</b>    | 119.238  | 276.765  | -1.215 | 0.000 |
| <b>NFIX</b>      | 905.859  | 2105.509 | -1.217 | 0.005 |
| <b>SERPINB1</b>  | 278.188  | 646.974  | -1.218 | 0.017 |
| <b>LOC729217</b> | 181.852  | 423.990  | -1.221 | 0.000 |
| <b>LOC653658</b> | 2208.794 | 5153.418 | -1.222 | 0.004 |
| <b>AADAACL1</b>  | 228.743  | 533.790  | -1.223 | 0.001 |
| <b>KIF5C</b>     | 106.638  | 250.450  | -1.232 | 0.001 |

Table S2

|                  |          |           |        |       |
|------------------|----------|-----------|--------|-------|
| <b>C21orf7</b>   | 105.992  | 249.852   | -1.237 | 0.004 |
| <b>PROCR</b>     | 152.775  | 360.225   | -1.237 | 0.001 |
| <b>RPL39L</b>    | 432.825  | 1023.787  | -1.242 | 0.002 |
| <b>LACTB2</b>    | 114.392  | 271.533   | -1.247 | 0.006 |
| <b>SASH1</b>     | 263.007  | 626.399   | -1.252 | 0.002 |
| <b>CMTM7</b>     | 413.930  | 986.006   | -1.252 | 0.004 |
| <b>CUTC</b>      | 248.227  | 592.109   | -1.254 | 0.003 |
| <b>TNFRSF21</b>  | 1254.059 | 2995.652  | -1.256 | 0.008 |
| <b>MT3</b>       | 132.995  | 317.749   | -1.257 | 0.005 |
| <b>CCK</b>       | 100.838  | 241.080   | -1.257 | 0.004 |
| <b>TMEM55A</b>   | 152.536  | 365.206   | -1.260 | 0.002 |
| <b>MOXD1</b>     | 245.581  | 588.062   | -1.260 | 0.000 |
| <b>HS.25892</b>  | 189.008  | 452.782   | -1.260 | 0.006 |
| <b>HS.537004</b> | 204.028  | 488.815   | -1.261 | 0.004 |
| <b>CDCP1</b>     | 92.397   | 221.443   | -1.261 | 0.007 |
| <b>PCSK1N</b>    | 118.550  | 284.522   | -1.263 | 0.000 |
| <b>NUP210</b>    | 105.069  | 252.346   | -1.264 | 0.000 |
| <b>CCDC99</b>    | 164.052  | 394.635   | -1.266 | 0.022 |
| <b>LOC642956</b> | 101.759  | 244.847   | -1.267 | 0.006 |
| <b>CORO1C</b>    | 334.080  | 804.948   | -1.269 | 0.019 |
| <b>CXCL14</b>    | 95.678   | 230.714   | -1.270 | 0.023 |
| <b>GOLT1A</b>    | 99.128   | 239.518   | -1.273 | 0.003 |
| <b>DENND2A</b>   | 257.801  | 623.728   | -1.275 | 0.001 |
| <b>PROS1</b>     | 172.852  | 419.037   | -1.278 | 0.002 |
| <b>CDKN3</b>     | 672.427  | 1634.240  | -1.281 | 0.003 |
| <b>CHST15</b>    | 102.527  | 249.886   | -1.285 | 0.012 |
| <b>CLDND1</b>    | 551.357  | 1349.197  | -1.291 | 0.001 |
| <b>LOC729926</b> | 809.945  | 1986.725  | -1.294 | 0.001 |
| <b>HS.413494</b> | 95.154   | 233.453   | -1.295 | 0.001 |
| <b>PRKCH</b>     | 106.964  | 262.887   | -1.297 | 0.005 |
| <b>MET</b>       | 522.427  | 1284.510  | -1.298 | 0.025 |
| <b>SPRED2</b>    | 191.596  | 471.838   | -1.300 | 0.007 |
| <b>TSC22D1</b>   | 593.888  | 1463.045  | -1.301 | 0.008 |
| <b>LGALS1</b>    | 5065.786 | 12484.367 | -1.301 | 0.000 |
| <b>C7orf40</b>   | 197.279  | 487.615   | -1.306 | 0.000 |
| <b>APOBEC3B</b>  | 142.345  | 352.068   | -1.306 | 0.003 |
| <b>RNF112</b>    | 99.599   | 246.544   | -1.308 | 0.001 |
| <b>CCNA2</b>     | 339.450  | 840.731   | -1.308 | 0.006 |
| <b>CDC2</b>      | 270.624  | 670.358   | -1.309 | 0.001 |
| <b>PHF16</b>     | 125.983  | 312.540   | -1.311 | 0.000 |
| <b>COL4A1</b>    | 253.143  | 628.137   | -1.311 | 0.002 |
| <b>C8orf13</b>   | 112.455  | 279.303   | -1.312 | 0.001 |
| <b>LMCD1</b>     | 191.808  | 476.632   | -1.313 | 0.017 |
| <b>FAF1</b>      | 187.225  | 465.315   | -1.313 | 0.000 |
| <b>FAM69A</b>    | 154.599  | 384.468   | -1.314 | 0.000 |
| <b>SKAP2</b>     | 147.040  | 366.652   | -1.318 | 0.001 |
| <b>CXXC5</b>     | 669.383  | 1669.709  | -1.319 | 0.008 |

Table S2

|                     |         |          |        |       |
|---------------------|---------|----------|--------|-------|
| <b>SLC1A1</b>       | 93.909  | 234.359  | -1.319 | 0.009 |
| <b>RGMA</b>         | 125.575 | 313.415  | -1.320 | 0.000 |
| <b>PSMB10</b>       | 699.934 | 1750.550 | -1.323 | 0.002 |
| <b>SLC9A7</b>       | 119.001 | 299.564  | -1.332 | 0.013 |
| <b>BEX2</b>         | 310.234 | 783.180  | -1.336 | 0.030 |
| <b>CSRP2</b>        | 940.443 | 2378.087 | -1.338 | 0.001 |
| <b>LRIG1</b>        | 559.941 | 1416.757 | -1.339 | 0.000 |
| <b>LQK1</b>         | 120.703 | 305.546  | -1.340 | 0.000 |
| <b>LOC100132564</b> | 218.927 | 557.805  | -1.349 | 0.004 |
| <b>NCAPD2</b>       | 239.530 | 611.665  | -1.353 | 0.000 |
| <b>DNAL4</b>        | 221.877 | 566.691  | -1.353 | 0.012 |
| <b>APCDD1</b>       | 114.033 | 291.649  | -1.355 | 0.046 |
| <b>CD68</b>         | 203.852 | 523.396  | -1.360 | 0.001 |
| <b>NFE2L3</b>       | 160.931 | 414.482  | -1.365 | 0.000 |
| <b>SPRY1</b>        | 292.167 | 754.946  | -1.370 | 0.001 |
| <b>NHP2L1</b>       | 359.003 | 927.652  | -1.370 | 0.001 |
| <b>C20orf100</b>    | 267.027 | 701.537  | -1.394 | 0.005 |
| <b>TUBB4</b>        | 106.779 | 280.615  | -1.394 | 0.000 |
| <b>RARRES3</b>      | 449.936 | 1182.906 | -1.395 | 0.017 |
| <b>TUBB6</b>        | 189.129 | 497.358  | -1.395 | 0.005 |
| <b>ALDOC</b>        | 507.913 | 1336.505 | -1.396 | 0.023 |
| <b>ARHGEF2</b>      | 507.079 | 1334.806 | -1.396 | 0.015 |
| <b>CNRIP1</b>       | 92.371  | 244.102  | -1.402 | 0.006 |
| <b>STAMBPL1</b>     | 96.027  | 254.817  | -1.408 | 0.008 |
| <b>LOC642073</b>    | 86.717  | 231.240  | -1.415 | 0.001 |
| <b>RBPMS2</b>       | 133.218 | 356.375  | -1.420 | 0.000 |
| <b>TMEM71</b>       | 116.567 | 312.267  | -1.422 | 0.000 |
| <b>HS.575038</b>    | 180.078 | 482.830  | -1.423 | 0.011 |
| <b>LOC399942</b>    | 735.356 | 1975.587 | -1.426 | 0.002 |
| <b>FAM102B</b>      | 103.871 | 279.083  | -1.426 | 0.001 |
| <b>SNHG6</b>        | 745.816 | 2006.069 | -1.427 | 0.019 |
| <b>NT5E</b>         | 353.394 | 954.988  | -1.434 | 0.009 |
| <b>RCAN2</b>        | 532.898 | 1440.741 | -1.435 | 0.015 |
| <b>SPC24</b>        | 154.765 | 418.615  | -1.436 | 0.002 |
| <b>HNRNPA2B1</b>    | 497.442 | 1347.537 | -1.438 | 0.012 |
| <b>RPL29</b>        | 239.539 | 653.212  | -1.447 | 0.003 |
| <b>DDIT4</b>        | 869.147 | 2375.063 | -1.450 | 0.010 |
| <b>MGST1</b>        | 134.335 | 368.170  | -1.455 | 0.000 |
| <b>SEMA4D</b>       | 90.552  | 248.263  | -1.455 | 0.000 |
| <b>HS.181245</b>    | 187.235 | 515.145  | -1.460 | 0.006 |
| <b>EBPL</b>         | 239.213 | 658.296  | -1.460 | 0.002 |
| <b>CCNB2</b>        | 601.643 | 1661.950 | -1.466 | 0.020 |
| <b>IL1A</b>         | 124.863 | 346.130  | -1.471 | 0.043 |
| <b>GYG1</b>         | 535.615 | 1491.708 | -1.478 | 0.000 |
| <b>LYN</b>          | 120.159 | 334.915  | -1.479 | 0.008 |
| <b>HACL1</b>        | 291.471 | 812.839  | -1.480 | 0.000 |
| <b>GPR56</b>        | 459.848 | 1283.757 | -1.481 | 0.039 |

Table S2

|              |          |          |        |       |
|--------------|----------|----------|--------|-------|
| TBC1D8       | 161.114  | 450.588  | -1.484 | 0.001 |
| POLE4        | 898.890  | 2517.166 | -1.486 | 0.004 |
| SUSD2        | 130.275  | 364.868  | -1.486 | 0.000 |
| CEP55        | 335.864  | 941.543  | -1.487 | 0.015 |
| PAM          | 1169.838 | 3283.981 | -1.489 | 0.000 |
| C6orf173     | 221.427  | 623.243  | -1.493 | 0.000 |
| BUB1         | 243.866  | 687.242  | -1.495 | 0.001 |
| HS.91389     | 291.705  | 825.070  | -1.500 | 0.002 |
| REEP2        | 140.815  | 398.432  | -1.501 | 0.000 |
| TIGA1        | 479.474  | 1359.792 | -1.504 | 0.007 |
| BCL3         | 303.826  | 864.052  | -1.508 | 0.001 |
| STX1A        | 251.857  | 716.407  | -1.508 | 0.036 |
| CCNB1        | 249.523  | 710.307  | -1.509 | 0.002 |
| VAT1L        | 168.842  | 482.699  | -1.515 | 0.008 |
| LOC100130506 | 223.921  | 642.155  | -1.520 | 0.013 |
| GCNT1        | 114.962  | 330.755  | -1.525 | 0.009 |
| GALNT10      | 108.594  | 315.506  | -1.539 | 0.000 |
| SKP1A        | 355.494  | 1033.646 | -1.540 | 0.001 |
| FABP5        | 109.915  | 319.832  | -1.541 | 0.003 |
| COX7A1       | 91.699   | 267.755  | -1.546 | 0.004 |
| NRCAM        | 547.792  | 1609.440 | -1.555 | 0.006 |
| ISG20        | 185.061  | 545.032  | -1.558 | 0.002 |
| FDFT1        | 1591.382 | 4703.518 | -1.563 | 0.008 |
| ECT2         | 284.057  | 840.036  | -1.564 | 0.000 |
| NCRNA00219   | 392.997  | 1163.328 | -1.566 | 0.008 |
| PDZD2        | 109.208  | 323.663  | -1.567 | 0.005 |
| LOC401115    | 458.412  | 1367.679 | -1.577 | 0.001 |
| RNF145       | 652.511  | 1954.476 | -1.583 | 0.001 |
| TMSB15A      | 85.869   | 257.563  | -1.585 | 0.004 |
| CKS2         | 1545.036 | 4672.081 | -1.596 | 0.005 |
| RGS10        | 123.037  | 372.142  | -1.597 | 0.007 |
| SLC9A3R1     | 588.017  | 1783.546 | -1.601 | 0.002 |
| ERI1         | 337.246  | 1026.809 | -1.606 | 0.000 |
| FOSL1        | 209.300  | 641.723  | -1.616 | 0.002 |
| MAP4K4       | 167.956  | 515.598  | -1.618 | 0.011 |
| SCG2         | 2119.558 | 6509.936 | -1.619 | 0.013 |
| MYADM        | 212.964  | 654.827  | -1.621 | 0.022 |
| STOM         | 198.634  | 613.989  | -1.628 | 0.001 |
| RPL13        | 234.097  | 725.932  | -1.633 | 0.001 |
| SLC44A2      | 232.427  | 722.261  | -1.636 | 0.000 |
| CA9          | 262.618  | 816.471  | -1.636 | 0.008 |
| PCBD1        | 143.865  | 449.095  | -1.642 | 0.004 |
| HLA-DQB1     | 88.976   | 278.287  | -1.645 | 0.000 |
| DMBT1        | 88.886   | 279.507  | -1.653 | 0.003 |
| HS.383564    | 97.204   | 305.929  | -1.654 | 0.010 |
| CLIC6        | 89.578   | 282.055  | -1.655 | 0.013 |
| SOX15        | 96.252   | 304.618  | -1.662 | 0.022 |

Table S2

|                  |          |          |        |       |
|------------------|----------|----------|--------|-------|
| <b>CENPF</b>     | 325.894  | 1033.069 | -1.664 | 0.010 |
| <b>FAM167A</b>   | 116.562  | 372.825  | -1.677 | 0.000 |
| <b>DOCK10</b>    | 98.222   | 315.972  | -1.686 | 0.007 |
| <b>MSRB2</b>     | 321.009  | 1037.367 | -1.692 | 0.000 |
| <b>LOC649143</b> | 94.852   | 306.879  | -1.694 | 0.003 |
| <b>FAM83D</b>    | 246.726  | 801.518  | -1.700 | 0.000 |
| <b>LYSMD2</b>    | 156.112  | 507.954  | -1.702 | 0.010 |
| <b>FAM3C</b>     | 183.932  | 601.307  | -1.709 | 0.008 |
| <b>PTPRG</b>     | 89.959   | 294.996  | -1.713 | 0.012 |
| <b>DPYSL3</b>    | 1204.613 | 3956.631 | -1.716 | 0.004 |
| <b>BIRC5</b>     | 175.638  | 577.708  | -1.718 | 0.000 |
| <b>HBEGF</b>     | 191.302  | 629.415  | -1.718 | 0.033 |
| <b>HLA-DMB</b>   | 240.097  | 794.211  | -1.726 | 0.013 |
| <b>HMGCS1</b>    | 839.346  | 2779.934 | -1.728 | 0.006 |
| <b>HS.66187</b>  | 120.920  | 400.815  | -1.729 | 0.012 |
| <b>COBL</b>      | 120.742  | 401.000  | -1.732 | 0.000 |
| <b>DKK3</b>      | 364.902  | 1215.004 | -1.735 | 0.001 |
| <b>GMPR</b>      | 100.814  | 335.699  | -1.735 | 0.000 |
| <b>BAIAP2L1</b>  | 159.181  | 530.210  | -1.736 | 0.004 |
| <b>HS3ST3A1</b>  | 121.118  | 404.969  | -1.741 | 0.000 |
| <b>AK3</b>       | 322.391  | 1084.357 | -1.750 | 0.000 |
| <b>NAV2</b>      | 112.319  | 379.212  | -1.755 | 0.004 |
| <b>C5orf62</b>   | 114.237  | 388.527  | -1.766 | 0.001 |
| <b>CTSH</b>      | 105.687  | 361.562  | -1.774 | 0.000 |
| <b>SDSL</b>      | 213.975  | 740.834  | -1.792 | 0.003 |
| <b>ADA</b>       | 225.256  | 784.739  | -1.801 | 0.006 |
| <b>C10orf35</b>  | 89.802   | 315.736  | -1.814 | 0.000 |
| <b>HJURP</b>     | 174.353  | 613.040  | -1.814 | 0.001 |
| <b>FAM129A</b>   | 92.689   | 327.904  | -1.823 | 0.016 |
| <b>MSX1</b>      | 245.979  | 870.288  | -1.823 | 0.007 |
| <b>PRDM8</b>     | 88.499   | 314.672  | -1.830 | 0.011 |
| <b>MVP</b>       | 258.996  | 930.786  | -1.846 | 0.000 |
| <b>DNAJC15</b>   | 105.081  | 380.135  | -1.855 | 0.020 |
| <b>TFPI</b>      | 97.856   | 355.932  | -1.863 | 0.000 |
| <b>SPARC</b>     | 2564.723 | 9350.666 | -1.866 | 0.000 |
| <b>OLFM1</b>     | 92.574   | 341.993  | -1.885 | 0.005 |
| <b>LAPTM4B</b>   | 443.938  | 1640.428 | -1.886 | 0.004 |
| <b>HAS3</b>      | 105.632  | 391.304  | -1.889 | 0.035 |
| <b>AIF1L</b>     | 109.788  | 408.048  | -1.894 | 0.023 |
| <b>LOC730525</b> | 238.196  | 886.582  | -1.896 | 0.006 |
| <b>BCL2L12</b>   | 284.773  | 1064.790 | -1.903 | 0.001 |
| <b>CHST1</b>     | 101.847  | 381.417  | -1.905 | 0.001 |
| <b>ARHGEF6</b>   | 316.109  | 1185.369 | -1.907 | 0.002 |
| <b>IRX3</b>      | 944.270  | 3551.790 | -1.911 | 0.007 |
| <b>HLA-DOA</b>   | 88.994   | 334.878  | -1.912 | 0.000 |
| <b>HLA-DQA1</b>  | 86.483   | 328.901  | -1.927 | 0.002 |
| <b>HS.193557</b> | 190.610  | 728.122  | -1.934 | 0.000 |

Table S2

|                     |          |          |        |       |
|---------------------|----------|----------|--------|-------|
| <b>HTRA1</b>        | 1869.256 | 7199.382 | -1.945 | 0.000 |
| <b>HMMR</b>         | 259.375  | 1004.544 | -1.953 | 0.000 |
| <b>HMGA1</b>        | 261.306  | 1018.281 | -1.962 | 0.004 |
| <b>ATOX1</b>        | 1040.349 | 4149.038 | -1.996 | 0.000 |
| <b>ANTXR2</b>       | 144.826  | 579.948  | -2.002 | 0.037 |
| <b>BCAT1</b>        | 171.259  | 688.039  | -2.006 | 0.012 |
| <b>ECM1</b>         | 113.266  | 460.851  | -2.025 | 0.000 |
| <b>ALPK2</b>        | 94.919   | 387.389  | -2.029 | 0.000 |
| <b>TWIST1</b>       | 96.918   | 395.715  | -2.030 | 0.002 |
| <b>FAM20C</b>       | 113.576  | 471.735  | -2.054 | 0.003 |
| <b>ALDH1A3</b>      | 86.540   | 359.921  | -2.056 | 0.013 |
| <b>GSTT1</b>        | 90.785   | 380.991  | -2.069 | 0.001 |
| <b>PTTG1</b>        | 1140.150 | 4890.812 | -2.101 | 0.004 |
| <b>IGFBP5</b>       | 227.956  | 980.906  | -2.105 | 0.001 |
| <b>LOC644936</b>    | 362.593  | 1593.355 | -2.136 | 0.023 |
| <b>COL13A1</b>      | 93.270   | 412.557  | -2.145 | 0.001 |
| <b>TMEM166</b>      | 88.600   | 392.729  | -2.148 | 0.012 |
| <b>BAG3</b>         | 555.479  | 2504.784 | -2.173 | 0.004 |
| <b>PRSS23</b>       | 375.781  | 1730.524 | -2.203 | 0.004 |
| <b>COMMD7</b>       | 349.916  | 1631.683 | -2.221 | 0.003 |
| <b>KHDRBS3</b>      | 387.761  | 1827.330 | -2.236 | 0.002 |
| <b>RTN1</b>         | 89.519   | 424.365  | -2.245 | 0.008 |
| <b>PTTG3P</b>       | 938.315  | 4491.758 | -2.259 | 0.001 |
| <b>LOC100133678</b> | 92.984   | 460.803  | -2.309 | 0.008 |
| <b>SNORD13</b>      | 135.788  | 704.142  | -2.375 | 0.003 |
| <b>CECR1</b>        | 140.901  | 739.244  | -2.391 | 0.000 |
| <b>C1orf54</b>      | 140.696  | 738.391  | -2.392 | 0.002 |
| <b>GABBR2</b>       | 491.190  | 2658.950 | -2.437 | 0.001 |
| <b>SCG5</b>         | 144.315  | 790.216  | -2.453 | 0.002 |
| <b>TGFA</b>         | 99.674   | 546.684  | -2.455 | 0.021 |
| <b>FEZ1</b>         | 106.224  | 585.473  | -2.462 | 0.001 |
| <b>GYPC</b>         | 93.489   | 524.672  | -2.489 | 0.000 |
| <b>KIF20A</b>       | 257.041  | 1457.144 | -2.503 | 0.000 |
| <b>ACOX2</b>        | 406.674  | 2325.742 | -2.516 | 0.000 |
| <b>EPAS1</b>        | 134.712  | 773.474  | -2.521 | 0.006 |
| <b>LOC100133583</b> | 89.792   | 534.455  | -2.573 | 0.003 |
| <b>GNG11</b>        | 372.564  | 2246.799 | -2.592 | 0.009 |
| <b>FABP5L2</b>      | 155.382  | 975.546  | -2.650 | 0.004 |
| <b>HS.10862</b>     | 95.743   | 621.328  | -2.698 | 0.024 |
| <b>DHRS3</b>        | 107.005  | 702.334  | -2.714 | 0.013 |
| <b>RFTN1</b>        | 88.904   | 598.997  | -2.752 | 0.003 |
| <b>SPOCK1</b>       | 105.510  | 742.749  | -2.815 | 0.002 |
| <b>CA12</b>         | 308.611  | 2191.443 | -2.828 | 0.001 |
| <b>COTL1</b>        | 119.194  | 857.092  | -2.846 | 0.005 |
| <b>TRIP6</b>        | 213.160  | 1647.685 | -2.950 | 0.001 |
| <b>ZIC2</b>         | 97.969   | 765.566  | -2.966 | 0.004 |
| <b>CD74</b>         | 89.281   | 709.861  | -2.991 | 0.005 |

Table S2

|                   |         |          |        |       |
|-------------------|---------|----------|--------|-------|
| <b>DUSP1</b>      | 294.069 | 2580.992 | -3.134 | 0.004 |
| <b>SPOCK2</b>     | 112.470 | 1011.866 | -3.169 | 0.010 |
| <b>FAM107A</b>    | 138.849 | 1282.503 | -3.207 | 0.000 |
| <b>HLA-DRB4</b>   | 100.641 | 990.175  | -3.298 | 0.005 |
| <b>HLA-DMA</b>    | 137.247 | 1385.862 | -3.336 | 0.000 |
| <b>EEF1A2</b>     | 103.839 | 1067.782 | -3.362 | 0.001 |
| <b>FOXD1</b>      | 87.624  | 950.199  | -3.439 | 0.003 |
| <b>C1orf24</b>    | 98.090  | 1086.666 | -3.470 | 0.020 |
| <b>SLC22A18AS</b> | 119.789 | 1401.916 | -3.549 | 0.007 |
| <b>GLDC</b>       | 89.698  | 1112.487 | -3.633 | 0.002 |
| <b>HLA-DRB6</b>   | 92.353  | 1260.775 | -3.771 | 0.004 |
| <b>TM4SF1</b>     | 237.159 | 3394.820 | -3.839 | 0.001 |
| <b>IFITM2</b>     | 214.761 | 3320.278 | -3.950 | 0.011 |
| <b>LOC730415</b>  | 90.892  | 1871.675 | -4.364 | 0.004 |
| <b>IFITM3</b>     | 181.025 | 4856.074 | -4.746 | 0.001 |
| <b>HLA-DPA1</b>   | 100.252 | 3176.688 | -4.986 | 0.002 |
| <b>HLA-DRA</b>    | 121.548 | 6249.570 | -5.684 | 0.002 |

Table S3

| <b>Symbol</b> | <b>miR-182</b> | <b>Co-miR</b> | <b>Log2ratio</b> |
|---------------|----------------|---------------|------------------|
| RCOR1         | 87.241         | 91.044        | -0.062           |
| NOTCH1        | 247.035        | 148.465       | 0.735            |
| TUBB3         | 1687.998       | 846.955       | 0.995            |
| FUT9          | 90.765         | 91.289        | -0.008           |
| ASCL1         | 91.261         | 93.168        | -0.030           |
| OLIG2         | 92.800         | 103.482       | -0.157           |
| NEUROD1       | 92.646         | 91.321        | 0.021            |
| PROM1         | 97.948         | 91.340        | 0.101            |
| DCX           | 95.443         | 91.730        | 0.057            |
| NKX2-2        | 89.378         | 99.432        | -0.154           |
| SOX11         | 94.331         | 89.345        | 0.078            |
| BMI1          | 576.456        | 453.619       | 0.346            |
| SLC1A1        | 93.909         | 234.359       | -1.319           |
| SOX10         | 92.114         | 94.816        | -0.042           |
| SOX2          | 284.773        | 1064.790      | -1.903           |
| PAX6          | 140.561        | 162.816       | -0.212           |
| NES           | 2906.197       | 1389.669      | 1.064            |
| HES1          | 158.748        | 297.511       | -0.906           |
| SOX9          | 311.445        | 699.870       | -1.168           |
| FABP7         | 2914.769       | 4245.449      | -0.543           |
| GFAP          | 88.044         | 90.486        | -0.039           |
| SLC1A2        | 95.696         | 104.362       | -0.125           |
| SLC1A3        | 855.077        | 694.679       | 0.300            |
| NEUROD2       | 91.642         | 94.123        | -0.039           |
| TBR1          | 89.557         | 93.747        | -0.066           |
| PAX9          | 93.984         | 97.321        | -0.050           |
| HAND1         | 97.566         | 136.806       | -0.488           |
| PAX2          | 91.003         | 94.645        | -0.057           |
| ASCL2         | 88.592         | 91.348        | -0.044           |
| SOX1          | 84.836         | 90.990        | -0.101           |
| CD44          | 3003.175       | 3340.058      | -0.153           |
| REST          | 98.919         | 98.718        | 0.003            |
| VIM           | 9049.822       | 12087.890     | -0.418           |
| GCM1          | 97.393         | 100.574       | -0.046           |



|                                      | Female (PBS) | Female (SNAs) | Female (PBS) | Female (SNAs) | Normal value range (female) | Male (PBS)   | Male (SNAs)  | Male (PBS)   | Male (SNAs)  | Normal value range (male) |
|--------------------------------------|--------------|---------------|--------------|---------------|-----------------------------|--------------|--------------|--------------|--------------|---------------------------|
|                                      | 24 hours     |               | 14 days      |               |                             | 24 hours     |              | 14 days      |              |                           |
| Initial Weight (g)                   | 217.7 ± 7.4  | 209.3 ± 11.9  | 205.1 ± 3.5  | 194.6 ± 2.4   |                             | 259.0 ± 3.4  | 248.0 ± 5.8  | 258.0 ± 4.4  | 252.1 ± 6.3  |                           |
| Terminal BW (g)                      | 216.7 ± 7.8  | 213.7 ± 9.5   | 242.5 ± 3.7  | 246.4 ± 3.9   |                             | 268.5 ± 2.8  | 251.6 ± 5.4  | 376.1 ± 15.5 | 345.5 ± 8.7  |                           |
| CHOL (mg/dL)                         | 80.3 ± 10.3  | 133.7 ± 4.9   | 64.0 ± 1.7   | 78.7 ± 4.7    | 60 - 152                    | 62.0 ± 7.8   | 164.0 ± 30.8 | 74.0 ± 3.6   | 63.7 ± 2.2   | 64 - 158                  |
| TRIG (mg/dL)                         | 129.0 ± 18.1 | 96.7 ± 37.71  | 70.0 ± 8.08  | 75.3 ± 11.7   | 41 - 330                    | 62.3 ± 4.3   | 59.0 ± 13.3  | 143.7 ± 39.7 | 131.7 ± 36.8 | 48 - 418                  |
| AST (U/L)                            | 117.7 ± 2.3  | 100.3 ± 11.3  | 114.7 ± 6.4  | 110 ± 7.5     | 52 - 310                    | 127.7 ± 19.3 | 125.3 ± 35.3 | 179.0 ± 49.7 | 141.7 ± 31.8 | 64 - 386                  |
| ALT (U/L)                            | 46.0 ± 5.6   | 31.7 ± 4.1    | 41.7 ± 3.7   | 49 ± 5.9      | 32 - 93                     | 34 ± 1.5     | 52.3 ± 5.9   | 57.0 ± 6.0   | 48.0 ± 7.6   | 37 - 178                  |
| ALK (U/L)                            | 335.0 ± 23.3 | 160.3 ± 30.3  | 231.7 ± 53.4 | 175.3 ± 34.3  | 61 - 359                    | 191.7 ± 47.5 | 329 ± 39.9   | 386.0 ± 23.4 | 228 ± 31.2   | 134 - 588                 |
| GLU (mg/dL)                          | 176.3 ± 13.7 | 203 ± 8.5     | 170 ± 12.5   | 173 ± 8.8     | 122 - 456                   | 165 ± 5.5    | 176.7 ± 9.2  | 164.3 ± 20.9 | 184.7 ± 12.2 | 110 - 456                 |
| Ca (mg/dL)                           | 9.9 ± 0.5    | 11.3 ± 0.1    | 9.9 ± 0.4    | 10.7 ± 0.2    | 10.4 - 14.2                 | 10.1 ± 0.15  | 11.0 ± 0.15  | 10.4 ± 0.1   | 10.2 ± 0.1   | 10.3 - 14.3               |
| PHOS (mg/dL)                         | 8.1 ± 0.8    | 8.4 ± 0.8     | 6.3 ± 0.5    | 7.2 ± 0.4     | 7.1 - 14.6                  | 7.8 ± 0.2    | 9.1 ± 0.6    | 7.8 ± 0.2    | 9.1 ± 0.5    | 7.9 - 16.6                |
| TBIL (mg/dL)                         | 0.1 ± 0.0    | 0.3 ± 0.0     | 0.1 ± 0.03   | 0.1 ± 0.0     | 0.1 - 0.3                   | 0.1 ± 0.0    | 0.1 ± 0.0    | 0.1 ± 0.0    | 0.1 ± 0.0    | 0.1 - 0.4                 |
| CREAT (mg/dL)                        | 0.3 ± 0.03   | 0.2 ± 0.0     | 0.4 ± 0.03   | 0.4 ± 0.00    | 0.3 - 0.6                   | 0.37 ± 0.03  | 0.2 ± 0.0    | 0.3 ± 0.0    | 0.3 ± 0.0    | 0.3 - 0.7                 |
| BUN (mg/dL)                          | 13 ± 0.0     | 14.7 ± 0.3    | 17.3 ± 0.9   | 16.7 ± 1.2    | 22-Jul                      | 15.67 ± 0.3  | 14.0 ± 1.5   | 16.3 ± 0.3   | 16.7 ± 0.3   | 23-Jul                    |
| TP (g/dL)                            | 4.8 ± 0.3    | 5.4 ± 0.2     | 5.4 ± 0.3    | 5.97 ± 0.12   | 6.2 - 8.5                   | 5.4 ± 0.2    | 4.7 ± 0.1    | 5.3 ± 0.1    | 5.1 ± 0.09   | 6.0 - 8.2                 |
| ALB (g/dL)                           | 2.8 ± 0.1    | 3.7 ± 0.2     | 3.2 ± 0.1    | 3.5 ± 0.1     | 3.3 - 4.7                   | 3.1 ± 0.09   | 3.3 ± 0.12   | 3.1 ± 0.1    | 3.0 ± 0.03   | 3.2 - 4.4                 |
| Na (mEq/L)                           | 131.5 ± 4.0  | 139.0 ± 0.8   | 136.6 ± 1.3  | 139.6 ± 1     | 137.7 - 169.7               | 132.0 ± 1.6  | 135.9 ± 0.6  | 132.0 ± 1.6  | 135.9 ± 2.1  | 138.3 - 171.3             |
| K (mEq/L)                            | 4.7 ± 0.2    | 4.2 ± 0.2     | 3.85 ± 0.23  | 4.11 ± 0.09   | 5.58 - 10.73                | 4.27 ± 0.27  | 4.98 ± 0.24  | 4.3 ± 0.3    | 4.98 ± 0.24  | 5.98 - 11.90              |
| Cl (mEq/L)                           | 92.7 ± 2.2   | 99.4 ± 1.5    | 101.0 ± 0.9  | 101.2 ± 0.4   | 96.7 - 119.7                | 93.8 ± 2.1   | 98.2 ± 0.8   | 93.8 ± 2.1   | 98.2 ± 0.8   | 95.8 - 120.3              |
| WBC (x10 <sup>3</sup> cells/μL)      | 10.2 ± 0.4   | 6.8 ± 0.5     | 6.24 ± 1.76  | 11.71 ± 1.71  | 2.40 - 17.68                | 5.83 ± 0.1   | 9.62 ± 0.85  | 5.83 ± 0.1   | 9.62 ± 0.85  | 4.01 - 18.02              |
| # NEUTS (x10 <sup>3</sup> cells/μL)  | 1.6 ± 0.25   | 1.0 ± 0.1     | 1.34 ± 0.48  | 1.64 ± 0.56   | 0.68 - 5.85                 | 0.81 ± 0.07  | 1.18 ± 0.15  | 0.81 ± 0.07  | 1.18 ± 0.15  | 0.98 - 6.73               |
| # LYMPHS (x10 <sup>3</sup> cells/μL) | 8.1 ± 0.2    | 5.3 ± 0.5     | 4.46 ± 1.4   | 9.69 ± 1.07   | 1.49 - 11.54                | 4.73 ± 0.04  | 7.85 ± 0.8   | 4.73 ± 0.04  | 7.85 ± 0.88  | 2.21 - 12.00              |
| # MONOS (x10 <sup>3</sup> cells/μL)  | 0.17 ± 0.01  | 0.3 ± 0.04    | 0.11 ± 0.04  | 0.17 ± 0.03   | 0.11 - 1.21                 | 0.08 ± 0.02  | 0.39 ± 0.03  | 0.08 ± 0.02  | 0.39 ± 0.03  | 0.18 - 1.43               |
| # EOS (x10 <sup>3</sup> cells/μL)    | 0.23 ± 0.13  | 0.24 ± 0.11   | 0.09 ± 0.02  | 0.12 ± 0.05   | 0.01 - 0.48                 | 0.18 ± 0.04  | 0.1 ± 0.02   | 0.18 ± 0.04  | 0.10 ± 0.02  | 0.01 - 0.50               |
| # BASOS (x10 <sup>3</sup> cells/μL)  | 0.03 ± 0.01  | 0.05 ± 0.01   | 0.01 ± 0.01  | 0.04 ± 0.01   | 0.00 - 0.16                 | 0.01 ± 0.0   | 0.08 ± 0.03  | 0.01 ± 0.00  | 0.08 ± 0.03  | 0.00 - 0.17               |
| # LUC (x10 <sup>3</sup> cells/μL)    | 0.03 ± 0.01  | 0.05 ± 0.01   | 0.02 ± 0.01  | 0.07 ± 0.02   |                             | 0.01 ± 0.0   | 0.08 ± 0.03  | 0.01 ± 0.00  | 0.08 ± 0.03  |                           |
| % NEUT                               | 15.4 ± 1.8   | 15.0 ± 1.7    | 21.5 ± 4.2   | 13.3 ± 2.6    | 13.75 - 54.79               | 13.9 ± 0.99  | 12.5 ± 1.99  | 13.9 ± 1.0   | 12.5 ± 2.0   | 16.01 - 53.86             |
| % LYM                                | 80.3 ± 2.3   | 77.1 ± 2.8    | 74.7 ± 4.6   | 83.5 ± 2.9    | 37.04 - 81.16               | 81.13 ± 1.4  | 81.3 ± 2.4   | 81.1 ± 1.4   | 81.3 ± 2.4   | 37.76 - 78.86             |
| % MONO                               | 1.7 ± 0.2    | 4.4 ± 0.5     | 1.6 ± 0.3    | 1.4 ± 0.1     | 2.8 - 11.0                  | 1.5 ± 0.3    | 4.1 ± 0.06   | 1.5 ± 0.3    | 4.1 ± 0.06   | 3.13 - 10.74              |
| % EOS                                | 2.1 ± 0.6    | 2.5 ± 0.8     | 1.7 ± 0.3    | 0.93 ± 0.23   | 0.16 - 4.77                 | 3.1 ± 0.6    | 1.1 ± 0.3    | 3.13 ± 0.6   | 1.1 ± 0.3    | 0.14 - 4.31               |
| % BASO                               | 0.23 ± 0.03  | 0.20 ± 0.00   | 0.17 ± 0.03  | 0.37 ± 0.03   | 0.00 - 1.56                 | 0.2 ± 0.0    | 0.2 ± 0.0    | 0.2 ± 0.0    | 0.2 ± 0.0    | 0.00 - 1.67               |
| % LUC                                | 0.3 ± 0.1    | 0.7 ± 0.2     | 0.33 ± 0.07  | 0.60 ± 0.1    |                             | 0.2 ± 0.06   | 0.8 ± 0.3    | 0.2 ± 0.06   | 0.8 ± 0.3    |                           |
| RBC (x10 <sup>6</sup> cells/μL)      | 6.66 ± 0.1   | 6.8 ± 0.17    | 7.06 ± 0.1   | 7.39 ± 0.30   | 5.53 - 9.83                 | 6.96 ± 0.13  | 6.57 ± 0.09  | 6.96 ± 0.13  | 6.57 ± 0.09  | 5.84 - 9.96               |
| HGB (g/dL)                           | 13.5 ± 0.2   | 17.6 ± 0.3    | 14.1 ± 0.3   | 14.4 ± 0.3    | 12.6 - 22.2                 | 13.8 ± 0.2   | 17.2 ± 0.4   | 13.8 ± 0.2   | 17.2 ± 0.4   | 13.1 - 23.1               |
| HCT (%)                              | 42.3 ± 0.8   | 41.4 ± 1.2    | 42.2 ± 0.92  | 43.1 ± 0.7    | 37.1 - 63.5                 | 41.6 ± 0.6   | 42.9 ± 1.0   | 41.60 ± 0.59 | 42.9 ± 1.0   | 38.8 - 68.7               |
| MCV (fL)                             | 63.6 ± 1.3   | 60.9 ± 1.3    | 59.8 ± 1.2   | 58.5 ± 1.2    | 57.8 - 75.4                 | 59.7 ± 0.5   | 65.4 ± 1.7   | 59.7 ± 0.5   | 65.4 ± 1.8   | 57.5 - 76.6               |
| MCH (PG)                             | 20.3 ± 0.3   | 25.9 ± 0.2    | 20.0 ± 0.3   | 19.5 ± 0.5    | 17.8 - 25.1                 | 19.9 ± 0.1   | 26.3 ± 0.4   | 19.9 ± 0.1   | 26.3 ± 0.4   | 16.9 - 25.1               |
| MCHC (pg)                            | 32 ± 0.2     | 42.5 ± 0.9    | 33.4 ± 0.2   | 33.3 ± 0.1    | 26.5 - 37.9                 | 33.2 ± 0.1   | 40.3 ± 0.1   | 33.2 ± 0.1   | 40.3 ± 0.1   | 26.8 - 37.7               |
| RDW (%)                              | 13.4 ± 0.35  | 11.3 ± 0.2    | 11.3 ± 0.2   | 11.1 ± 0.2    | 13.1 - 16.9                 | 11.5 ± 0.1   | 14.3 ± 0.7   | 11.5 ± 0.09  | 14.3 ± 0.7   | 14.2 - 18.0               |
| PLT (x10 <sup>3</sup> cells/μL)      | 981 ± 230    | 902 ± 7.2     | 935 ± 35     | 1241 ± 52     | 751 - 2390                  | 860 ± 19.1   | 780 ± 100.5  | 860 ± 19.1   | 780 ± 100.5  | 771 - 2618                |
| MPV (fL)                             | 7.6 ± 0.3    | 7.1 ± 0.2     | 7.5 ± 0.3    | 6.9 ± 0.2     | 5.8 - 9.6                   | 7.2 ± 0.2    | 7.6 ± 0.35   | 7.2 ± 0.2    | 7.6 ± 0.4    | 5.8 - 238.0               |

Table S5

|                    | Saline (21d) | Co-SNA (21d) | 182-SNA (21d) |
|--------------------|--------------|--------------|---------------|
|                    | n=4          | n=4          | n=4           |
| <b>G-CSF</b>       | 252.2        | 159.4        | 135.7         |
| <b>Eotaxin</b>     | 839.5        | 899.5        | 524.2         |
| <b>GM-CSF</b>      | 21.8         | 16.2         | 12.5          |
| <b>IFN gamma</b>   | <4.42        | <4.42        | <4.42         |
| <b>IL-1 alpha</b>  | 570          | 554.3        | 421.5         |
| <b>IL-2</b>        | 11.1         | 14.1         | 14.4          |
| <b>IL-5</b>        | 34.6         | 8.4          | 10            |
| <b>IL-6</b>        | 5.1          | 5            | 9.8           |
| <b>IL-7</b>        | <3.64        | <3.64        | <3.64         |
| <b>IL-10</b>       | 6.6          | 5.9          | 4.9           |
| <b>IL-12 (p70)</b> | 8.4          | 8.8          | 8.6           |
| <b>IL-12 (p40)</b> | 15.3         | 16.3         | 13.7          |
| <b>IL-13</b>       | 109.6        | 98.8         | 72.9          |
| <b>LIX</b>         | 12605        | 11637        | 10414         |
| <b>IL-15</b>       | 42.6         | 56.9         | 45.2          |
| <b>IL-17</b>       | <3.43        | 3.8          | 3.8           |
| <b>IP-10</b>       | 230.2        | 181.4        | 132.5         |
| <b>KC</b>          | 158.7        | 133.2        | 107.6         |
| <b>MCP-1</b>       | 35.5         | 34.7         | 33.8          |
| <b>MLP-1 alpha</b> | 76.1         | 74.3         | 72.5          |
| <b>MIP-1 beta</b>  | 57.1         | 64.3         | 71.4          |
| <b>M-CSF</b>       | 17.7         | 15.1         | 12.6          |
| <b>MIP-2</b>       | 87           | 67.4         | 47.9          |
| <b>MIG</b>         | 10.3         | 15.9         | 21.5          |
| <b>TNF alpha</b>   | 7.2          | 5.7          | 6.4           |
